# Supplementary material
Source: ML conference proceedings conference paper supplement (https://openreview.net/forum?id=dH6KDsG5GK)
Supplement: supplementary_material [file NeurIPS2025_supp.pdf › NeurIPS2025_supp.pdf]

---

# Online Experimental Design With Estimation-Regret Trade-off Under Network Interference

---

Anonymous Author(s)

Affiliation

Address

email

## Abstract

1 Network interference has attracted significant attention in the field of causal infer-  
2 ence, encapsulating various sociological behaviors in which the treatment assigned  
3 to one individual within a network may affect the outcomes of others, such as their  
4 neighbors. A key challenge in this setting is that standard causal inference methods  
5 often assume independent treatment effects among individuals, which may not hold  
6 in networked environments. To estimate interference-aware causal effects, a tradi-  
7 tional approach is to inherit the independent settings, where practitioners randomly  
8 assign experimental participants to different groups and compare their outcomes.  
9 Although effective in offline settings, this strategy becomes problematic in sequen-  
10 tial experiments, where suboptimal decisions persist, leading to substantial regret.  
11 To address this issue, we introduce a unified interference-aware framework for  
12 online experimental design. Compared to existing studies, we extend the definition  
13 of arm space using the statistical concept of exposure mapping, which allows for  
14 a more flexible and context-aware representation of treatment effects in network  
15 settings. Crucially, we establish a Pareto-optimal trade-off between estimation  
16 accuracy and regret under the network concerning both time period and arm space,  
17 which remains superior to baseline models even without network interference. Fur-  
18 thermore, we propose an algorithmic implementation and discuss its generalization  
19 in different learning settings and network topology.

## 20 1 Introduction

21 Network interference has attracted significant attention in the fields of causal inference [Leung,  
22 2022a,b, 2023] and online statistical learning theory [Agarwal et al., 2024, Jia et al., 2024], due to  
23 its capability to capture more complex real-world interactions. Unlike the Stable Unit Treatment  
24 Value Assumption (SUTVA) assumption [Imbens, 2024], which posits that the treatment assignment  
25 and outcomes are isolated to individuals, network interference acknowledges the influences that  
26 treatments received by one individual may have on the outcomes of others within a network. This  
27 model has found extensive application in economics [Arpino and Mattei, 2016, Munro et al., 2021]  
28 and social sciences [Bandiera et al., 2009, Bond et al., 2012, Paluck et al., 2016, Imbens, 2024],  
29 where understanding such interconnected dynamics is crucial.

30 To successfully identify causal effect under network interference, one straightforward way is to  
31 conduct randomized experiments and use the difference in means type estimators to estimate causal  
32 effect based on the experimental data [Leung, 2022a,b, 2023, Gao and Ding, 2023]. Such design is  
33 related to many applications [Ciotti et al., 2020, Cai et al., 2015]. For instance, Ciotti et al. [2020]  
34 suggested the randomized experiment on a group of volunteering patients to investigate the therapeutic  
35 average treatment effects of various drugs for influenza, e.g., COVID-19, where each individual’s  
36 status of cure is influenced by the treatment assignment of their neighboring individuals. In practice,  
37 an experiment may consist of multiple rounds, and researchers may wish to use the experimental

data from the previous rounds to enhance the social welfare of the experimental participants by minimizing the regret of the future rounds [Mok et al., 2021]. This requires us to consider the trade-off between the *estimation accuracy* of the causal effect and the *cumulative regret* of the experiment. Apparently, such an online experiment represents a more complex design than offline. For example, if experimental designers directly borrow the Bernoulli sampling in offline design [Leung, 2022a], they would empirically result in a regret linear to round time due to the lack of optimal strategy exploration. This motivates us to design a sequential policy that theoretically guarantees the optimal trade-off between the two objectives under interference. Besides, such sequential policy is also relevant to multi-armed bandits with network interference literature [Jia et al., 2024, Agarwal et al., 2024], which focuses primarily on minimizing regret rather than improving estimation accuracy.

To reiterate, it is crucial to recognize that estimation efficiency and regret might not be optimized simultaneously, necessitating a careful consideration of the trade-off between these two objectives. Optimal estimation efficiency, such as the Bernoulli design above, generally requires that the sampling probability of each arm remains strictly greater than zero, where the sub-optimal decision persists, leading to substantial regret. Conversely, optimal algorithms, such as the Upper Confidence Bound (UCB) [Auer et al., 2002] and its variants, employ probability-vanishing exploration strategies for sub-optimal arms, potentially violating the overlap assumption in causal inference [D’Amour et al., 2021]. This violation limits the estimator’s precision, as the overlap assumption is critical for ensuring valid causal inferences by maintaining sufficient data across all arms Sekhon [2009].

Existing works that explore the estimation-regret trade-off often overlook the presence of network interference, effectively assuming a scenario where only a single individual is considered throughout the experiment. Perspectives include empirical algorithm design [Liang and Bojinov, 2023], theoretical bi-objective optimization [Simchi-Levi and Wang, 2024], and analyses of the interaction between trade-offs and exogenous model assumptions [Duan et al., 2024]. In comparison, our work extends such a trade-off in the context of network interference. Integrating the aforementioned perspectives requires an elevated viewpoint to construct a challenging yet more universally applicable framework. Specifically, we introduce a unified online network interference-based experimental design setting, referred to as MAB-N. This setting extends the definition of arm space in the multi-armed bandit (MAB) literature by employing the statistical concept of exposure mapping [Leung, 2022a, Aronow and Samii, 2017]. We derive the theoretical optimal estimation-regret trade-off within it and provide an algorithmic implementation capable of achieving this optimal balance. Our contributions are summarized as follows: 1) We establish a unified setting for online experimental design with network interference, referred to as MAB-N, which leverages the statistical concept of exposure mapping. 2) We bridge the multi-objective minimax trade-off, achieving Pareto-optimality between treatment effect estimation and regret efficiency under network interference. Additionally, we propose criteria for a MAB algorithm to achieve Pareto-optimality. 3) We propose the UCB-TSN algorithm to achieve the aforementioned Pareto trade-off by constructing an upper bound for both the Average treatment effect (ATE) estimation error and regret, which is also validated by experiments. Our UCB-TSN algorithm outperforms the elegant preliminary work in (i) the degenerated single-unit case without interference and (ii) the extended adversarial bandit setting. The simulation results are provided in the Appendix E to validate its effectiveness.

Our paper is organized as follows: Section 2 provides a brief literature review. Section 3 introduces our general MAB-N setting and discusses Pareto-optimality to illustrate the estimation-regret trade-off. Section 4 provides a general lower bound for the joint performance of regret and estimation, followed by the criteria for any algorithm to achieve Pareto optimality. Section 5 proposes the Pareto-optimal algorithmic implementation and includes a comparison with the baseline. Section 6 extends MAB-N to adversarial cases. Finally, Section 7 concludes the paper with further discussion.

## 2 Related Work

Our results primarily bridge two lines of research: (i) extending bandit modeling scenarios by integrating interference settings from the statistical community [Agarwal et al., 2024, Jia et al., 2024], and (ii) exploring the trade-off between estimation and regret in online learning without network interference [Simchi-Levi and Wang, 2024, Duan et al., 2024], as detailed in Table 2 in Appendix C. In the first line of research, the insightful work of Agarwal et al. [2024] creatively utilizes Fourier analysis to reformulate interference-aware bandits as sparse linear stochastic bandits. This innovative approach, however, focuses on interference among first-order neighbors and incorporates

a sparsity assumption to limit the number of neighbors each node can have. Complementing this, the meticulous study by Jia et al. [2024] advances the understanding of bandits under interference by forgoing such assumptions, though their methodology requires a switchback design. This design insists that all nodes adopt the same arm synchronously, potentially overlooking scenarios where the optimal arm varies across nodes or subgroups. Turning to the second line of research, we commend Simchi-Levi and Wang [2024] for pioneering a rigorous trade-off between regret and estimation error. Additionally, Duan et al. [2024] contribute significantly by proposing enhancements to this Pareto-optimality, suggesting that both regret and estimation error might simultaneously reach their optimal levels under the thoughtful assumption of covariate diversity. We invite readers to explore further details on these related works in Appendix C.

### 3 Framework

**Classic MAB under network interference.** We introduce our setting following Agarwal et al. [2024], which generalizes Auer et al. [2002], Simchi-Levi and Wang [2024] to the network interference. We focus on the stochastic bandit problem involving a  $K$ -armed set  $\mathcal{K} = \{k\}_{k=0}^{K-1}$ , an  $N$ -unit set  $\mathcal{U} = \{i\}_{i=1}^N$ , and the time horizon  $t \in [T]$ . The relationship between units is encoded in the adjacency matrix  $\mathbb{H} := \{h_{ij}\}_{i,j \in \mathcal{U}}$ <sup>1</sup>, where  $h_{i,j} = 1$  signifies that units  $i$  and  $j$  are neighbors, whereas  $h_{i,j} = 0$  otherwise.  $K, N, \mathbb{H}$  are predefined. At each round, unit interactions induce interference effects. The *original super arm* is represented by an  $N$ -dimension vector  $A_t := (a_{1,t}, \dots, a_{N,t}) \in \mathcal{K}^{\mathcal{U}}$ . To bridge this formulation to causal inference, we start by notating the so-called potential outcome in statistics [Rubin, 2005] (expected reward in the bandit community [Auer et al., 2002]) as  $\{Y_i(A_t)\}_{i \in \mathcal{U}} = \{Y_i(a_{1,t}, a_{2,t}, \dots, a_{N,t})\}_{i \in \mathcal{U}}$  for unit  $i$  in time  $t$ <sup>2</sup>. Without loss of generality, we set  $\forall i \in \mathcal{U}, A \in \mathcal{K}^{\mathcal{U}}, Y_i(A) \in [0, 1]$ . In this sense, the *single-unit reward* of unit  $i$  upon time  $t$  is given by  $r_{i,t}(A_t) = Y_i(A_t) + \eta_{i,t}$ , where  $r_{i,t}(\cdot)$  represents the reward function of unit  $i \in \mathcal{U}$ , and  $\eta_{i,t}$  is zero-mean i.i.d. 1-sub Gaussian noise for each unit. Finally, we define instance  $\nu$  as any legitimate choice of  $\{\mathcal{D}(Y_i(A))\}_{i \in \mathcal{U}, A \in \mathcal{K}^{\mathcal{U}}}$ , where  $\mathcal{D}(Y_i(A))$  denotes the reward distribution of unit  $i$  if super arm  $A$  is pulled; and then denote  $\mathcal{E}_0$  as the set of all feasible  $\nu$ . Our primary interest is designing a learning policy  $\pi := (\pi_1, \dots, \pi_T)$ . In round  $t$ , the agent observes the history  $\mathcal{H}_{t-1} = \{A_1, \{r_{i,1}(A_1)\}_{i \in \mathcal{U}}, \dots, A_{t-1}, \{r_{i,t-1}(A_{t-1})\}_{i \in \mathcal{U}}\}$ , where each term is an  $N$ -dimensional vector. The policy  $\pi_t$  is a probabilistic map from  $\mathcal{H}_{t-1}$  to the next action  $A_t$ . We denote  $\pi_t(A) = \mathbb{P}_{\pi}(A_t = A \mid \mathcal{H}_{t-1})$  indicating the probability that a super arm  $A$  is selected in round  $t$ .

**Additional notation.** We define  $e_i$  as the standard basis vector whose  $i$ -th element is 1 and all other elements are 0. For any  $Q \in \mathbb{N}^+$ , we use the shorthand notation  $[Q] := \{1, 2, \dots, Q\}$ . We define the operations:  $a \vee b := \max\{a, b\}$ ,  $a \wedge b := \min\{a, b\}$ . For sequences of positive numbers  $\{a_n\}_{n \in \mathbb{N}^+}$  and  $\{b_n\}_{n \in \mathbb{N}^+}$ , we adopt the following asymptotic notations:  $a_n = O(b_n)$  if there exists a constant  $C > 0$  such that for all sufficiently large  $n$ ,  $a_n \leq Cb_n$ ;  $a_n = \Omega(b_n)$  if there exists a constant  $C > 0$  such that for all sufficiently large  $n$ ,  $a_n \geq Cb_n$ ;  $a_n = \Theta(b_n)$  if both  $a_n = O(b_n)$  and  $a_n = \Omega(b_n)$  hold. Finally,  $a_n = \tilde{O}(b_n)$  if there exist constants  $C > 0$  and  $k \in \mathbb{N}^+ \cup \{0\}$  such that  $a_n \leq Cb_n(\log b_n)^k$ .

#### 3.1 Motivation: the hardness of classic MAB under interference

In this framework, referring to the concept of cumulative regret in traditional MAB problems [Lattimore and Szepesvári, 2020b], the performance metric of policy  $\pi$  could be identified as

$$\mathcal{R}^{naive}(T, \pi) := \frac{T}{N} \sum_{i \in \mathcal{U}} Y_i(A^*) - \mathbb{E}_{\pi} \left[ \frac{1}{N} \sum_{t \in [T]} \sum_{i \in \mathcal{U}} r_{i,t}(A_t) \right], \quad A^* := \arg \max_{A \in \mathcal{K}^{\mathcal{U}}} \frac{1}{N} \sum_{i \in \mathcal{U}} Y_i(A). \quad (1)$$

Foreseeably, a fundamental challenge in this setting is that the original super arm suffers from an exponentially large action space ( $|\mathcal{K}^{\mathcal{U}}| = K^N$ ), making direct optimization infeasible. Given this

<sup>1</sup>It does not mean we must get all information about  $\mathbb{H}$ ; instead, it depends on our detailed design.

<sup>2</sup>Unit  $i$ 's potential outcome is only related to the treatments of the total population via a fixed function, as is standard in interference-based causality [Leung, 2022a,b, 2023]. This setting relaxes the traditional "Stable Unit Treatment Value Assumption" (SUTVA) [Rubin, 1980], which assumes that one unit's outcome is unaffected by others' treatments.

computational burden, we first establish a *negative result* to illustrate that directly pursuing the policy  $\pi$  using the original super arm is computational *impractical*.

**Proposition 1** *Given a priori  $N, K, \mathbb{H}$ . For any policy  $\pi$ , there exists a hard instance  $\nu \in \mathcal{E}_0$  such that  $\mathcal{R}_\nu^{\text{naive}}(T, \pi) = \Omega(\frac{1}{\sqrt{N}}(T \wedge \sqrt{K^N T}))$ .*

Proposition 1 reveals that the regret convergence rate is influenced by the relative size of the time period compared to the arm space, resulting in a two-piece function. Specifically, when  $T \leq K^N$  under interference, the regret  $\mathcal{R}_\nu^{\text{naive}}(T, \pi)$  increases linearly with  $T$ . Conversely, otherwise, although the rate degenerates to a square root relative to  $T$ , it is adversely affected by an exponentially large parameter ( $\sqrt{K^N/N}$ ). This negative result, from a counter perspective, substantiates why Agarwal et al. [2024] and Jia et al. [2024] respectively relaxed the model from the network topology and action space: Agarwal et al. [2024] prudently considers interference only from first-order neighbors and incorporates sparsity assumptions, while Jia et al. [2024] restrict the action space to the all one and all zero  $N$ -dimensional vector. Without such considerations, obtaining meaningful regret bounds would be unfeasible.

Further, it manifests more insights upon the triple of concepts (i) time, (ii) regret, and (iii) arm space, than lower bound analysis in classic MAB [Lattimore and Szepesvári, 2020b]. It is because researchers tend to preemptively judge that “time period  $\gg$  arm numbers”, e.g., force  $N = 1$  in the single-unit setting and then  $T \gg K$  holds by default. However, this oversimplification consideration of arm space can be detrimental under the interference scenario. For instance, even if we just choose  $K = 2, N = 30$ , any algorithm under interference-based MAB setting would potentially be cursed by an impractical regret. In sum, these insights motivate us to develop a general statistical framework to allow for a more reasonable reduction in the action space dimension without imposing excessive assumptions on the network topology, which is the so-called MAB-N, illustrated as follows.

### 3.2 Setting: MAB-N

We introduce the concept of *exposure mapping* developed by Leung [2022a], Aronow and Samii [2017]. We define the pre-specified function mapping from the original super arm space ( $\mathcal{K}^N$ ) to a  $d_s$ -cardinality discrete values ( $d_s \ll K^N$ ) taking advantage of the network structure. For clarity, we consider the discrete function case:

$$s_i := \mathbf{S}(i, A, \mathbb{H}), \text{ where } \mathbf{S} : \mathcal{U} \times \mathcal{K}^{\mathcal{U}} \times \mathbb{H} \rightarrow \mathcal{U}_s, |\mathcal{U}_s| = d_s. \quad (2)$$

Here  $\mathcal{U}_s$  is called as exposure arm set. We set  $S = \{\mathbf{S}(i, A, \mathbb{H})\}_{i \in \mathcal{U}} \equiv (s_1, \dots, s_N)$  as the *exposure super arm*, and then we can decompose the policy  $\pi_t(\cdot)$  and define the exposure-based reward:

$$\begin{aligned} \pi_t(A) &:= \mathbb{P}(A_t = A \mid \mathcal{H}_{t-1}) = \mathbb{P}(A_t = A \mid S_t) \mathbb{P}(S_t \mid \mathcal{H}_{t-1}), \\ [\tilde{Y}_i(S_t), \tilde{r}_{i,t}(S_t)]^\top &:= \sum_{A \in \mathcal{K}^{\mathcal{U}}} [Y_i(A), r_{i,t}(A)]^\top \mathbb{P}(A_t = A \mid S_t), \end{aligned} \quad (3)$$

The second line of Eq (3) generalizes the framework of Leung [2022a] by incorporating a broader class of exposure mappings. Specifically, while the original formulation assumes a fixed exposure structure, our approach allows for a more flexible characterization of treatment assignments under network interference. Detailed derivations are deferred to Appendix F. To formalize in practice, we could define  $\mathbb{P}(A_t = A \mid S)$  as a *predefined, time-invariant* sampling rule, which the learner specifies before the learning process begins. For example, in the case of uniform sampling (by default), we have:  $\mathbb{P}_\pi(A_t = A \mid S) = \sum_{A \in \mathcal{K}^{\mathcal{U}}} \delta\{\mathbb{A}\} / |\mathbb{A}|$ , where  $\delta(\cdot)$  is an indicator function, and  $\mathbb{A} := \{A : \{\mathbf{S}(i, A, \mathbb{H})\}_{i \in \mathcal{U}} = S\}$  denotes the set of all assignments that result in the observed exposure state  $S_t$ . This formulation ensures that if  $S$  does not match the set  $\{\mathbf{S}(i, A, \mathbb{H})\}_{i \in \mathcal{U}}$ , the probability of selecting  $A_t = A$  given  $S$  is zero. Conversely, if  $S$  corresponds to this set, then  $A$  is chosen with strictly positive probability, i.e.,  $\mathbb{P}(A_t = A \mid S) > 0$ . Under this framework, the observed outcome  $\tilde{Y}_i(S_t)$  in Eq (3) depends solely on the network topology  $\mathbb{H}$  and the exposure state  $S_t$ , independent of the specific arm assignment  $A_t$ . This highlights a key property of exposure mapping: it abstracts away individual-level treatment assignments while preserving the structural dependencies induced by network interference. To further quantify decision-making performance under network interference, we introduce the exposure reward  $\tilde{r}_{i,t}(S_t)$ , which serves as a proxy for

the expected reward in the exposure space<sup>3</sup>. Building on this exposure-based representation, we now define the regret function, which quantifies the performance gap between the optimal and chosen policies under exposure mapping.

**Regret based on exposure mapping.** According to the action space reduction in Eq (3), we provide a more general and realistic regret compared to Jia et al. [2024], Simchi-Levi and Wang [2024], Agarwal et al. [2024] (refer to Example 1-4). We define the clustering set  $\mathcal{C} := \{\mathcal{C}_q\}_{q \in [C]}$ ,  $C = |\mathcal{C}|$  where  $\forall i \neq j, i, j \in [C], \mathcal{C}_i \cap \mathcal{C}_j = \emptyset, \cup \{\mathcal{C}_q\}_{q \in [C]} = \mathcal{U}$ . For brevity, we denote  $\mathcal{C}^{-1}(i)$  as the cluster of node  $i$ . We define the exposure-based regret:

$$\mathcal{R}_\nu(T, \pi) = \frac{T}{N} \sum_{i \in \mathcal{U}} \tilde{Y}_i(S^*) - \frac{1}{N} \mathbb{E}_\pi \left[ \sum_{t \in [T]} \sum_{i \in \mathcal{U}} \tilde{r}_{i,t}(S_t) \right], \quad S^* = \arg \max_{S \in \mathcal{U}_\mathcal{E}} \sum_{i \in \mathcal{U}} \tilde{Y}_i(S), \quad (4)$$

where exposure arm space  $\mathcal{U}_\mathcal{E} := \mathcal{U}_\mathcal{C} \cap \mathcal{U}_\mathcal{O}$  with  $\mathcal{U}_\mathcal{C} := \{S : \forall i, j \in \mathcal{U}, \mathcal{C}^{-1}(i) = \mathcal{C}^{-1}(j) \text{ implies } S e_i = S e_j\}$  and  $\mathcal{U}_\mathcal{O} := \{\mathbf{S}(i, A, \mathbb{H})\}_{i \in \mathcal{U}} : A \in \mathcal{K}^\mathcal{U}\}$ . Here,  $\mathcal{U}_\mathcal{C}$  denotes all kinds of ideally cluster-wise switchback exposure super arm. For instance, if  $\mathcal{U}_s \in \{0, 1\}$ ,  $N = 4$ ,  $\mathcal{C}_1 = \{1, 2\}$ ,  $\mathcal{C}_2 = \{3, 4\}$ , then  $\mathcal{U}_\mathcal{C} = \{(k_1, k_1, k_2, k_2) : k_1, k_2 \in \{0, 1\}\}$ . Moreover,  $\mathcal{U}_\mathcal{O}$  includes all exposure arm sets compatible with the original arm set. It induces that  $|\mathcal{U}_\mathcal{E}| \leq |d_s|^C$ . Essentially, during the exposure mapping process, we efficiently reduce the action space by condensing the original arm information in a structured manner, thereby achieving a controlled enhancement of regret efficiency. According to Proposition 1, this balance between sacrifice and gain emerges naturally and inevitably. Such cluster-wise exposure mapping structures have appeared in multiple prior works. We illustrate how our framework can surrogate previous settings as special cases. By assigning specific parameter values, we can (i) flexibly transition between these cases (the following examples), (ii) allow for an adaptive balance in different scenarios (Table 1 in Appendix C), and (iii) even characterize new and more general real-world scenarios (experiments in Appendix E) where existing methods would fundamentally fail.

**Comparison with previous literature.** For the comparison of regret, **Example (i)** Classic MAB [Auer et al., 2002, Simchi-Levi and Wang, 2024] considered the case  $N = 1$ , i.e., single unit without network, and  $\mathbf{S}(1, A, \mathbb{H}) := A$ ,  $A \in \mathcal{K}$ . **Example (ii)** Agarwal et al. [2024] chooses  $\mathbf{S}(i, A, \mathbb{H}) := A e_i$  and  $C = N$  (each unit is assigned to a separate cluster). **Example (iii)** On the other hand, Jia et al. [2024] chooses  $\mathbf{S}(i, A, \mathbb{H}) := A e_i$  and  $C = 1$  (all units are in one cluster), which denotes the global proportion of treatment in each time  $t$ . Additionally, the exposure mapping and clustering technique could also be traced back to the offline setting. **Example (iv)** Suppose  $\forall j \in \mathcal{U}, \sum_j h_{ij} > 0$ . We can choose  $\mathbf{S}(i, A, \mathbb{H}) := \mathbf{1}\{\sum_{j \in \mathcal{U}} h_{ij} a_j / \sum_{j \in \mathcal{U}} h_{ij} \in [0, \frac{1}{2}]\}$  inherited from the literature of offline causality [Leung, 2022a, Gao and Ding, 2023]. They require approximate neighborhood interference and their objective is to explore the influence of the treatment assignment proportion among all neighborhoods of each unit, which is still under-explored in the online learning scenario (we refer readers to experiments in Appendix E). **Example (v)** For a supplement, we point out that the clustering strategy could also be traced back to the offline setting, which is also our special case: Viviano et al. [2023], Zhang and Imai [2023] considered the clustering-based setting  $\mathbf{S}(i, A, \mathbb{H}) := A e_i$ , in which only considers the set of the exposure arm  $\{0, 1\}^C$ . Specifically, Viviano et al. [2023] focuses on the Bernoulli design in clusters, while Zhang and Imai [2023] further assumes that interference occurs only within clusters rather than across clusters.

In these examples, they all satisfy  $\mathcal{U}_\mathcal{E} = \mathcal{U}_\mathcal{C} \cap \mathcal{U}_\mathcal{O} \neq \emptyset$ . We provide more justification for it in the next section and Appendix N.

### 3.3 Goal: estimation-regret trade-off

We introduce the goal of the trade-off between the regret efficiency and statistical power of reward gap estimation. ATE between exposure super arm  $S_i$  and  $S_j$  is defined as the reward gap [Simchi-Levi and Wang, 2024]:  $\Delta^{(i,j)} := \frac{1}{N} \sum_{i' \in \mathcal{U}} (\tilde{Y}_{i'}(S_i) - \tilde{Y}_{i'}(S_j))$ , where  $S_i, S_j \in \mathcal{U}_\mathcal{E}$ . It is a generalized

<sup>3</sup>Notably, the difference between  $\tilde{Y}_i(S_t)$  and the empirically observed reward  $r_{i,t}(A_t)$  arises from two distinct noise components: (i) sampling noise, where practitioners approximate  $\tilde{r}_{i,t}(S_t)$  using samples of  $r_{i,t}(A_t)$ , and (ii) endogenous noise, inherited from the original variability  $\eta_{i,t}$  in the observed reward. A detailed discussion on noise rescaling is provided in Appendix F.

definition compared with the most relevant literature [Jia et al., 2024, Agarwal et al., 2024, Simchi-Levi and Wang, 2024] when considering ATE (specifying the exposure mapping function as in Table 1 of Appendix C). We use  $\hat{\Delta}^{(i,j)} := \{\hat{\Delta}_t^{(i,j)}\}_{t \geq 1}$ ,  $\hat{\Delta} := \{\hat{\Delta}^{(i,j)}\}_{S_i, S_j \in \mathcal{U}_\mathcal{E}}$  to identify a sequence of adaptive admissible estimates of  $\Delta^{(i,j)}$ . The total design of an MAB experiment could be represented by the vector  $\{\pi, \hat{\Delta}\}$ . Our final goal is to portray the mini-max trade-off:

$$\min_{\{\pi, \hat{\Delta}\}} \max_{\nu \in \mathcal{E}_0} (\mathcal{R}_\nu(T, \pi), e_\nu(T, \hat{\Delta})), \text{ where } e_\nu(T, \hat{\Delta}) := \max_{S_i, S_j \in \mathcal{U}_\mathcal{E}} \mathbb{E}[\|\Delta^{(i,j)} - \hat{\Delta}_T^{(i,j)}\|]. \quad (5)$$

Given any feasible  $\nu$ ,  $\mathcal{R}_\nu(T, \pi)$  is associated with  $\pi$ , while  $e_\nu(T, \hat{\Delta})$  is associated with  $\hat{\Delta}$ . Due to the complicated relation between  $\pi$  and  $\hat{\Delta}$  w.r.t. the history  $\mathcal{H}_t$ ,  $t \in [T]$ , especially in the network interference setting, this multi-objective optimization is quite challenging. For preparation, we define what is the “best” pair of  $\{\pi, \hat{\Delta}\}$  via the following definition of *front*:

**Definition 1 (Front and Pareto-dominate)** For a given pair of  $\{\pi, \hat{\Delta}\}$ , we call a set of pairs  $(\mathcal{R}, e)$  as a front of  $\{\pi, \hat{\Delta}\}$ , denoted by  $\mathcal{F}(\pi, \hat{\Delta})$ , if and only if (i) [Feasible instances exists]  $\mathcal{V}_0 := \{\nu_0 \in \mathcal{E}_0 : (\sqrt{\mathcal{R}_{\nu_0}(T, \pi)}, e_{\nu_0}(T, \hat{\Delta})) = (\mathcal{R}, e)\} \neq \emptyset$ , and (ii) [instances in  $\mathcal{V}_0$  are the best]  $\nexists \nu \in \mathcal{E}/\mathcal{V}_0$ , s.t.  $\exists \otimes \in \{K, T\}$ ,  $(\mathcal{R}, e) \preceq_{\otimes} (\sqrt{\mathcal{R}_\nu(T, \pi)}, e_\nu(T, \hat{\Delta}))$ . We claim  $\{\pi, \hat{\Delta}\}$  Pareto-dominate another solution  $\{\pi', \hat{\Delta}'\}$  if  $\forall (\mathcal{R}, e) \in \mathcal{F}(\pi, \hat{\Delta})$ ,  $\exists (\mathcal{R}', e') \in \mathcal{F}(\pi', \hat{\Delta}')$ , such that  $\forall \otimes \in \{K, T\}$ , either (i)  $\mathcal{R} \preceq_{\otimes} \mathcal{R}'$ ,  $e \prec_{\otimes} e'$  or (ii)  $\mathcal{R} \prec_{\otimes} \mathcal{R}'$ ,  $e \preceq_{\otimes} e'$ <sup>4</sup>.

We formalize the definition of *front* in the symbol of order  $\preceq_{\otimes}$ ,  $\prec_{\otimes}$ . e.g.,  $(a, b) \preceq_{\otimes} (c, d)$ ,  $e \prec_{\otimes} f$ ,  $g \preceq_{\otimes} h$  denotes  $(a \leq c, b \leq d)$ ,  $e < f$ ,  $g \leq h$  when we only consider the parameter with respect to  $\otimes \in \{K, T\}$  sufficiently large and omit any other parameter. Finally, Pareto-optimality is identified according to the Pareto-dominance in Definition 1 as follows.

**Definition 2 (Pareto-optimal and Pareto Frontier)** A feasible pair  $(\pi^*, \hat{\Delta}^*)$  is claimed to be Pareto-optimal when it is not Pareto-dominated by any other feasible solution. Pareto Frontier  $\mathcal{P}$  is denoted as the envelope of fronts of all Pareto-optimal solutions.

For example, according to Definition 2,  $\{\pi_i, \hat{\Delta}_i\}_{i \in [3]}$  is not dominated by each other in Figure 1. For more intuitive comprehension for practitioners, we provide the closed-form mathematical formulation in the following section.

## 4 Pareto-optimality

In the above section, we introduce the motivation and establishment of our MAB-N and then construct the mini-max trade-off problem along with the Pareto-optimality property. In this section, we explore in detail the lower bound of such trade-off and the geometric structure of Pareto optimality. According to the Definition 1-2, in the following text, our analysis upon optimality mainly focuses on the individual arm space  $K$  and the time horizon  $T$ . Here  $K$  is included in the exposure arm space  $\mathcal{U}_\mathcal{E}$ . Other parameters, such as  $N$ , are seen as a pre-fixed constant. We first introduce the following condition to restrict the fairly broad relationship between parameters.

**Condition 1** Exposure mapping  $\mathbf{S}$  and clusters  $\mathcal{C}$  should satisfy  $2 \leq |\mathcal{U}_\mathcal{E}| \leq T$ .

Condition 1 restricts to the case where  $T$  is relatively large with pre-specified non-empty  $\mathcal{U}_\mathcal{E}$ , which is inherently verifiable, adjustable and relevant. Regardless of any pre-fixed  $\mathbb{H}$ , we could manually design legitimate (2) and clusters to fit Condition 1. It is the weakest condition to date, without additional restriction upon network topology, compared to the previous literature mentioned in the above section. Additional justification on exposure mapping and feasibility of model conditions are in Appendix D and Appendix N. Under such conditions, we establish a general lower bound when simultaneously considering the regret and estimation error.

<sup>4</sup>Intuitively speaking, if we denote the region formed by  $\mathcal{F}(\pi, \hat{\Delta})$ ,  $\mathcal{F}(\pi', \hat{\Delta}')$ , X-axis and Y-axis in the first quadrant as  $\text{Region}(\pi, \hat{\Delta})$ ,  $\text{Region}(\pi', \hat{\Delta}')$ , respectively. Then  $\{\pi, \hat{\Delta}\}$  Pareto-dominate  $\{\pi', \hat{\Delta}'\}$  means  $\text{Region}(\pi, \hat{\Delta}) \subseteq \text{Region}(\pi', \hat{\Delta}')$ .

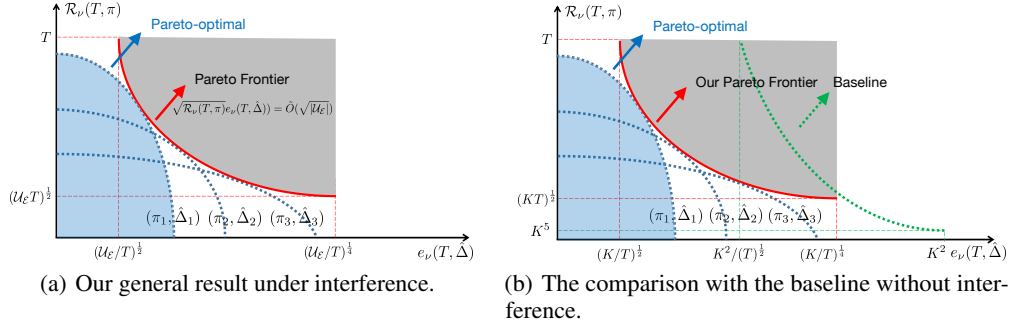

Figure 1: Pareto-optimality. (a) We use three blue fronts (first quadrant) to show three different MAB algorithms  $\{\pi_i, \hat{\Delta}_i\}_{i \in [3]}$ , e.g., the blue regions represent the regrets and estimation errors that can be realistically achieved in all kinds of instances given  $\{\pi_1, \hat{\Delta}_1\}$ . MAB algorithm is Pareto-optimal if and only if its blue front is tangent to the Pareto Frontier (red) (otherwise, it is intersecting with the grey region). (b) The green line represents the baseline in Simchi-Levi and Wang [2024], which loses the Pareto-optimality concerning arm space.

**Theorem 1** Given any  $\mathbf{S}$  and  $\mathcal{C}$  that satisfies Condition 1. Given any online decision-making policy  $\pi$ , the trade-off between the regret and the estimation exhibits

$$\inf_{\hat{\Delta}_T} \max_{\nu \in \mathcal{E}_0} \left( \sqrt{\mathcal{R}_\nu(T, \pi)} e_\nu(T, \hat{\Delta}) \right) = \Omega_{K, T} \left( \sqrt{|\mathcal{U}_\mathcal{E}|} \right). \quad (6)$$

We use the subscript  $\{K, T\}$  to emphasize that the order just corresponds to these two parameters and omit the subscript in the following text.

**The challenge of the proof.** The core idea involves constructing two carefully designed multi-armed bandit instances,  $\nu_1$  and  $\nu_2$ , such that any estimator  $\hat{\Delta}_T$  faces challenges in simultaneously achieving low regret and high estimation accuracy across both instances. This difficulty is divided into three parts: (i) Regarding the goal, unlike the regret lower bound analysis in classic multi-armed bandit problems [Lattimore and Szepesvári, 2020a], we employ statistical hypothesis testing to bridge these two goals, rather than analyzing worst-case regret in isolation. (ii) Concerning instance construction, compared to Simchi-Levi and Wang [2024], constructing two distinct instances is challenging due to the interference affecting the entire system, making it difficult for an algorithm's regret or estimation behavior to differ significantly. (iii) From an information-theoretic perspective, the correlated structure complicates the issue. The networked nature of exposure rewards necessitates a refined divergence measure that accounts for shifts in probability mass across dependent actions, such as when applying the Kullback-Leibler inequality.

**The sketch of the proof.** We defer the detailed proof in Appendix H. To tackle these challenges, we carefully construct a pair of instances via slightly perturbing the reward of  $Y(A_t)$  compatible with specific exposure arms: we let  $Y_i(A) := f_i(A) \in (\varepsilon_0, 1 - \varepsilon_0)$ ,  $\varepsilon_0 \in (0, 1)$ ,  $r_{i,t}(A) \in \{-1, 1\}$ . It means  $r_{i,t}(A) = \text{Rad}(\frac{1-f_i(A)}{2}, \frac{1+f_i(A)}{2})$ . Moreover, We establish :

$$r'_{i,t}(A) := \begin{cases} r_{i,t}(A) & \forall A \text{ satisfying } \mathbb{P}(A_t = A | S) = 0. \\ \text{Rad}(\frac{1-f_i(A)+\alpha}{2}, \frac{1+f_i(A)-\alpha}{2}) & \forall A \text{ satisfying } \mathbb{P}(A_t = A | S) > 0. \end{cases} \quad (7)$$

with  $\alpha > 0$  sufficiently small, and  $S$  is specifically selected. Conducting the information-theoretic argument, we prove

$$\inf_{\hat{\Delta}_T} \max_{\nu \in \mathcal{E}_0} \mathbb{P}_\nu \left( \max_{i,j \in \mathcal{U}_\mathcal{E}} |\hat{\Delta}_T^{(i,j)} - \Delta_\nu^{(i,j)}| \geq \frac{\alpha}{2} \right) \geq \frac{1}{2} \left[ 1 - \sqrt{\frac{1}{2} q' N \alpha^2 \frac{\mathcal{R}_{\nu_1}(T, \pi)}{|\mathcal{U}_\mathcal{E}|}} \right].$$

Here  $q'$  is a constant. Such inequality bridges the relationship between the statistical power and regret efficiency under these two instances and thus induces the final lower bound in Theorem 1.

Theorem 1 states that for any given policy  $\pi$ , there always exists at least one hard MAB instance  $\nu$ , in which no matter what legitimate  $\mathbf{S}$ ,  $\mathcal{C}$ , and estimator  $\hat{\Delta}_T$  we choose, the lower

bound  $\Omega(\sqrt{|\mathcal{U}_\mathcal{E}|})$  always holds. In other words, there are always challenging instance  $\nu$  such that  $e_\nu(T, \hat{\Delta}) = \Omega_{K,T}(\sqrt{|\mathcal{U}_\mathcal{E}|}/\sqrt{\mathcal{R}_\nu(T, \pi)})$ . We take examples considering the worst case of  $\nu$ : according to the fact  $\mathcal{R}_\nu(T, \pi) = O(T)$ , Theorem 1 states that the worst estimation error is at least  $\Omega((|\mathcal{U}_\mathcal{E}|/T)^{\frac{1}{2}})$  and could not be further decreased; stepping forwards, as we will show in Section 5 that our proposed MAB-N algorithm’s regret is upper bounded by  $O(\sqrt{|\mathcal{U}_\mathcal{E}|T})$ , then Theorem 1 additionally states that the worst estimation error of our algorithm will be ideally at least  $(|\mathcal{U}_\mathcal{E}|/T)^{\frac{1}{4}}$  without need of further implementation. In sum, Theorem 1 serves as a *free lunch*, enabling practitioners to perform interactive inference and prediction regarding the trade-off between the algorithm’s regret efficiency and statistical power. A natural question is what is the relationship between the lower bound and the Pareto-optimality? We provide the following closed-form for Pareto Frontier following the lower bound in Theorem 1.

**Theorem 2** *Following the condition in Theorem 1, a feasible pair  $\{\pi, \hat{\Delta}\}$  is Pareto-optimal if the pair satisfies  $\max_{\nu \in \mathcal{E}_0} (\sqrt{\mathcal{R}_\nu(T, \pi)} e_\nu(T, \hat{\Delta})) = \tilde{O}(\sqrt{|\mathcal{U}_\mathcal{E}|})$ . The Pareto Frontier is represented as  $\mathcal{P} = \{(\mathcal{R}_\nu(T, \pi), e_\nu(T, \hat{\Delta})) : \sqrt{\mathcal{R}_\nu(T, \pi)} e_\nu(T, \hat{\Delta}) = \tilde{O}(\sqrt{|\mathcal{U}_\mathcal{E}|})\}$ .*

Theorem 2 establishes the sufficiency condition for the Pareto-optimal property. We also analyze the necessity conditions in Appendix I. For a visual representation, readers are referred to Figure 1, which illustrates the Pareto-optimal pairs  $\pi, \hat{\Delta}$  (blue region) and the Pareto Frontier (red line). Theorems 1 and 2 are applicable to any complex network topology  $\mathbb{H}$  under mild conditions on exposure mapping (Condition 1). These results not only generalize non-trivial trade-offs under network interference but also enhance the degenerated results without interference. Specifically, when compared to the setting of Simchi-Levi and Wang [2024], (i) we advance the Pareto-optimality trade-off concerning arm space, and (ii) we eliminate their additional assumption on ATE, specifically that  $\hat{\Delta}^{i,j} = \Theta(1)$ . Furthermore, our reward  $r_t$  is not constrained to the interval  $[-1, 1]$ , allowing for unbounded values.

## 5 Algorithm

In Section 5, we introduce the Upper Confidence Bound algorithm with Two Stages under Network interference (UCB-TSN). Our UCB-TSN operates in two phases: (i) uniformly explore the exposure super arm space using a round-robin approach to estimate the ATE within  $T_1$  rounds. and (ii) applying the UCB exploration strategy to minimize regret. The pseudo code is provided in the appendix due to the space limitation. Initially, we demonstrate that phase (i) effectively reduces the estimation error, as detailed below.

**Theorem 3 (ATE estimation upper bound)** *Following the condition in Theorem 1. If  $T_1 \geq |\mathcal{U}_\mathcal{E}|$ , for any  $S_i \neq S_j \in \mathcal{U}_\mathcal{E}$ , the ATE estimation error of UCB-TSN can be upper bounded as  $\mathbb{E}[|\hat{\Delta}_T^{(i,j)} - \Delta^{(i,j)}|] = \tilde{O}(\sqrt{|\mathcal{U}_\mathcal{E}|/T_1})$ .*

Theorem 3 asserts that uniform exploration in phase (i) aids in estimating the ATE. This is intuitive, as UCB-TSN explores the exposure action space using a round-robin approach. Provided that the practitioner selects  $T_1 = \Omega(T^\alpha)$  for  $\alpha \in (0, 1)$ , the ATE estimation is consistent. Following the uniform exploration in phase (i), phase (ii) focuses on identifying the optimal arm, leading to the convergence of the overall regret.

**Theorem 4 (Regret upper bound)** *Following the condition in Theorem 1. With  $\delta = 1/T^2$  and  $T_1 \geq |\mathcal{U}_\mathcal{E}|$ , the regret of UCB-TSN can be upper bounded as  $\mathcal{R}(T, \pi) = \tilde{O}(\sqrt{|\mathcal{U}_\mathcal{E}|T} + T_1)$ .*

Theorem 4 claims the regret could converge as  $o(T)$ , accommodating with well-selected  $T_1$ , such as  $T_1 = \sqrt{|\mathcal{U}_\mathcal{E}|T}$ . Theorem 4 is consistent with Proposition 1 when we omit phase (i), i.e.,  $T_1 = 0$  and reserve phase (ii). By the combination of Theorem 3-4, we claim the Pareto-optimality as stated in Section 4 in our UCB-TSN as follows.

**Corollary 1 (Trade-off result)** *Following the condition in Theorem 1. Set  $T_1 \geq \sqrt{|\mathcal{U}_\mathcal{E}|T}$ , for all  $\nu \in \mathcal{E}_0$ , UCB-TSN can guarantee  $e_\nu(T, \hat{\Delta})\sqrt{\mathcal{R}_\nu(T, \pi)} = \tilde{O}(\sqrt{|\mathcal{U}_\mathcal{E}|})$ .*



Corollary 1 states that under a stricter but still mild condition upon the uniform exploration process  $T_1$  (since  $\sqrt{|\mathcal{U}_\mathcal{E}|T} \geq |\mathcal{U}_\mathcal{E}|$  under Condition 1), UCB-TSN could achieve the Pareto-optimal property according to Theorem 1.

**Comparison with the baseline algorithm.** To facilitate the fair comparison, we consider the degenerated case as in Simchi-Levi and Wang [2024], where we choose  $N = 1, |\mathcal{U}_\mathcal{E}| = K \geq 2$  in our UCB-TSN. Here  $\mathcal{K}$  corresponds to  $\mathcal{U}_\mathcal{E}$ . We compare the regret in (i) and estimation in (ii). (i) For the regret, they proposed their EXP3EG which guarantees the regret upper bound as  $\mathcal{R}_\nu(T, \pi) = \tilde{O}(K^5 + T^{1-\alpha})$ , where  $\alpha \in [0, 1]^5$ . Such result is build upon their assumption  $\frac{1}{N} \sum_{i' \in \mathcal{U}} (\tilde{Y}_{i'}(S^*) - \tilde{Y}_{i'}(S_i)) = \Theta(1)$  for all  $S_i \neq S^*$ . In this single-agent setting with such assumption, it should be pointed out that our regret upper bound in Theorem 4 could be naturally strengthened to  $\tilde{O}(K + T_1)$  (refer to our instance dependent regret upper bound in Lemma 1 in the Appendix). Thus our regret upper bound is strictly stronger than theirs if we force  $T_1 = O(T^{1-\alpha})$ . (ii) For the estimation error, they state that ATE could be upper bounded by  $e_\nu(T, \pi) = \tilde{O}(K^2 T^{-\frac{1-\alpha}{2}})$ . Therefore our estimation error in Theorem 3, i.e.,  $\tilde{O}(\sqrt{|\mathcal{U}_\mathcal{E}|/T_1}) = \tilde{O}(\sqrt{K/T_1})$  is strictly stronger than theirs since it is legitimate to force  $T_1 = T^{1-\alpha} \vee |\mathcal{U}_\mathcal{E}|$ . Such strict improvement (i)-(ii) is illustrated in Figure 1. It validates the statements under Theorem 2 that we achieve the Pareto optimality with respect to time period  $T$  and additionally, the exposure super arm space  $|\mathcal{U}_\mathcal{E}|$ .

## 6 Extension to adversarial setting

**The adversarial setting.** We cover Simchi-Levi and Wang [2024]’s adversarial setting when considering trade-offs. We consider  $r_{i,t}(A_t) = Y_i(A_t) + f_t + \eta_{i,t}$ , where  $\eta_{i,t}$  is i.i.d. zero means noise. In addition to the standard setting in the preliminaries, there is an  $f_t$ , a pre-specified function w.r.t. period  $t$ , which is an adversarial noise. We suppose  $r_{i,t}(A) \in [0, 1]$  for all  $i \in \mathcal{U}$ ,  $A \in \mathcal{K}^\mathcal{U}$  and  $t \in [T]$ . It is also easy to verify that  $\tilde{r}_{i,t}(S) \in [0, 1]$  for all  $t \in [T]$ ,  $S_i \in \mathcal{U}_\mathcal{E}$ ,  $i \in \mathcal{U}$  and  $\mathbb{E}[\tilde{r}_{i,t}(S)] = \tilde{Y}_i(S) + f_t$ . Motivated by the fact that the UCB algorithm discussed in the previous section cannot be applied directly in this context, we provide the advanced EXP3-TSN algorithm for substitution. The pseudo-code and details of the EXP3-TSN are provided in the Appendix.

**Theorem 5 (Pareto-optimality trade-off in the adversarial setting)** *Following the condition in Theorem 1, let  $\mathcal{T}(t) \equiv (2|\mathcal{U}_\mathcal{E}| + 1)^2 \log(t|\mathcal{U}_\mathcal{E}|^2)/2(e - 2)|\mathcal{U}_\mathcal{E}|$ , then (i) [ATE estimation] Suppose  $T \geq \mathcal{T}(T)$  and  $T_1 \geq \mathcal{T}(T_1)$ . For any  $S_i \neq S_j$ , the ATE estimation error of the EXP3-TSN can be upper bounded as in Theorem 3. (ii) [Regret] Stepping back, if we only suppose  $T \geq \mathcal{T}(T)$ , then the regret of EXP3-TSN could be upper bounded as in Theorem 4. (iii) [Pareto-optimality] Stepping forward, additionally set  $T_1 \geq \mathcal{T}(T_1) \vee \sqrt{|\mathcal{U}_\mathcal{E}|T}$ . then EXP3-TSN can also guarantee the Pareto-optimality trade-off, i.e.,  $e_\nu(T, \hat{\Delta})\sqrt{\mathcal{R}(T, \pi)} = \tilde{O}(\sqrt{|\mathcal{U}_\mathcal{E}|})$ .*

Theorem 5 states that under additional mild conditions, i.e.,  $T \geq \mathcal{T}(T)$  and  $T_1 \geq \mathcal{T}(T_1)^6$ , the regret, ATE estimation error and the Pareto-Optimality trade-off could still keep their original form in Theorem 3-4. In such an adversarial setting, our result can also outperforms Simchi-Levi and Wang [2024] with the same argument as in Section 5, and the discussion concerning the order of the node number  $N$  aligns analogously.

## 7 Conclusion and future work

We establish a unified online learning framework under network interference via statistical exposure mapping, balancing learning efficiency and statistical power through a Pareto-optimal trade-off between regret and estimation error. We also introduce UCB-TSN, an algorithm achieving this balance with provable guarantees. In the future, we aim to investigate the estimation-regret trade-off in fully adversarial networked bandit, and extend it to more general and complex topics such as multi-agent reinforcement learning, online learning in causal inference and bandit in large language models.

<sup>5</sup>In their paper,  $\mathcal{R}_\nu(T, \pi) = O(\sum_{A \in \mathcal{K}/\{A^*\}} K^4 \log(T) + T^{1-\alpha} \log(T)) = \tilde{O}(K^5 + T^{1-\alpha})$ . Here  $A^*$  denotes the best arm.

<sup>6</sup>Since  $\mathcal{T}(t) = O(|\mathcal{U}_\mathcal{E}| \log(|\mathcal{U}_\mathcal{E}|t))$ , such conditions are natural to satisfy given that  $T$  is sufficiently large.

## References

- Abhineet Agarwal, Anish Agarwal, Lorenzo Masoero, and Justin Whitehouse. Multi-armed bandits with network interference. *arXiv preprint arXiv:2405.18621*, 2024.
- Shipra Agrawal and Navin Goyal. Thompson sampling for contextual bandits with linear payoffs. In *International Conference on Machine Learning*, 2012.
- Venkatachalam Anantharam, Pravin Varaiya, and Jean Walrand. Asymptotically efficient allocation rules for the multiarmed bandit problem with multiple plays-part i: Iid rewards. *IEEE Transactions on Automatic Control*, 32(11):968–976, 1987.
- Peter M Aronow and Cyrus Samii. Estimating average causal effects under general interference, with application to a social network experiment. *The Annals of Applied Statistics*, 2017.
- Bruno Arpino and Alessandra Mattei. Assessing the causal effects of financial aids to firms in tuscany allowing for interference. *The Annals of Applied Statistics*, 2016.
- Peter Auer, Nicolò Cesa-Bianchi, and Paul Fischer. Finite-time analysis of the multiarmed bandit problem. *Machine Learning*, 47:235–256, 2002.
- Oriana Bandiera, Iwan Barankay, and Imran Rasul. Social connections and incentives in the workplace: Evidence from personnel data. *Econometrica*, 77(4):1047–1094, 2009.
- Pietro Belotti, Christian Kirches, Sven Leyffer, Jeff Linderoth, James Luedtke, and Ashutosh Mahajan. Mixed-integer nonlinear optimization. *Acta Numerica*, 22:1–131, 2013.
- Lilian Besson and Emilie Kaufmann. Multi-player bandits revisited. In *Algorithmic Learning Theory*, pages 56–92. PMLR, 2018.
- Robert M Bond, Christopher J Fariss, Jason J Jones, Adam DI Kramer, Cameron Marlow, Jaime E Settle, and James H Fowler. A 61-million-person experiment in social influence and political mobilization. *Nature*, 489(7415):295–298, 2012.
- Giuseppe Burtini, Jason Loeppky, and Ramon Lawrence. A survey of online experiment design with the stochastic multi-armed bandit. *arXiv preprint arXiv:1510.00757*, 2015.
- Jing Cai, Alain De Janvry, and Elisabeth Sadoulet. Social networks and the decision to insure. *American Economic Journal: Applied Economics*, 7:81–108, 2015.
- Nicolo Cesa-Bianchi and Gábor Lugosi. Combinatorial bandits. *Journal of Computer and System Sciences*, 78(5):1404–1422, 2012.
- Shouyuan Chen, Tian Lin, Irwin King, Michael R Lyu, and Wei Chen. Combinatorial pure exploration of multi-armed bandits. *Advances in Neural Information Processing Systems*, 27, 2014.
- Wei Chen, Yajun Wang, and Yang Yuan. Combinatorial multi-armed bandit: General framework and applications. In *International conference on machine learning*, pages 151–159. PMLR, 2013.
- Brian Cho, Dominik Meier, Kyra Gan, and Nathan Kallus. Reward maximization for pure exploration: Minimax optimal good arm identification for nonparametric multi-armed bandits. *arXiv preprint arXiv:2410.15564*, 2024.
- Marco Ciotti, Massimo Ciccozzi, Alessandro Terrinoni, Wen-Can Jiang, Cheng-Bin Wang, and Sergio Bernardini. The covid-19 pandemic. *Critical reviews in clinical laboratory sciences*, 57(6):365–388, 2020.
- Richard Combes, Mohammad Sadegh Talebi Mazraeh Shahi, Alexandre Proutiere, et al. Combinatorial bandits revisited. *Advances in Neural Information Processing Systems*, 28, 2015.
- Yash Deshpande, Adel Javanmard, and Mohammad Mehrabi. Online debiasing for adaptively collected high-dimensional data with applications to time series analysis. *Journal of the American Statistical Association*, 118(542):1126–1139, 2023.
- Maria Dimakopoulou, Zhengyuan Zhou, Susan Athey, and Guido Imbens. Estimation considerations in contextual bandits. *arXiv preprint arXiv:1711.07077*, 2017.

431 Maria Dimakopoulou, Zhengyuan Zhou, Susan Athey, and Guido Imbens. Balanced linear contextual  
432 bandits. In *Proceedings of the AAAI Conference on Artificial Intelligence*, volume 33, pages  
433 3445–3453, 2019.

434 Maria Dimakopoulou, Zhimei Ren, and Zhengyuan Zhou. Online multi-armed bandits with adaptive  
435 inference. *Advances in Neural Information Processing Systems*, 34:1939–1951, 2021.

436 Congyuan Duan, Wanteng Ma, Jiashuo Jiang, and Dong Xia. Regret minimization and statistical infer-  
437 ence in online decision making with high-dimensional covariates. *arXiv preprint arXiv:2411.06329*,  
438 2024.

439 Alexander D’Amour, Peng Ding, Avi Feller, Lihua Lei, and Jasjeet Sekhon. Overlap in observational  
440 studies with high-dimensional covariates. *Journal of Econometrics*, 221(2):644–654, 2021.

441 Mengsi Gao and Peng Ding. Causal inference in network experiments: regression-based analysis and  
442 design-based properties. *arXiv preprint arXiv:2309.07476*, 2023.

443 Vitor Hadad, David A Hirshberg, Ruohan Zhan, Stefan Wager, and Susan Athey. Confidence intervals  
444 for policy evaluation in adaptive experiments. *Proceedings of the national academy of sciences*,  
445 118(15): e2014602118, 2021.

446 Qiyu Han, Will Wei Sun, and Yichen Zhang. Online statistical inference for matrix contextual bandit.  
447 *arXiv preprint arXiv:2212.11385*, 2022.

448 Jiafan He, Tianhao Wang, Yifei Min, and Quanquan Gu. A simple and provably efficient algorithm  
449 for asynchronous federated contextual linear bandits. *arXiv preprint arXiv:2207.03106*, 2022.

450 Eshcar Hillel, Zohar S. Karnin, Tomer Koren, Ronny Lempel, and Oren Somekh. Distributed  
451 exploration in multi-armed bandits. In *Advances in Neural Information Processing Systems*, 2013.

452 Michael G Hudgens and M Elizabeth Halloran. Toward causal inference with interference. *Journal*  
453 *of the American Statistical Association*, 103(482):832–842, 2008.

454 Guido W Imbens. Causal inference in the social sciences. *Annual Review of Statistics and Its*  
455 *Application*, 11, 2024.

456 Kevin G. Jamieson, Matthew Malloy, Robert D. Nowak, and Sébastien Bubeck. lil’ ucb : An optimal  
457 exploration algorithm for multi-armed bandits. *arXiv preprint arXiv:1312.7308*, 2013.

458 Su Jia, Nishant Oli, Ian Anderson, Paul Duff, Andrew A Li, and Ramamoorthi Ravi. Short-lived  
459 high-volume bandits. In *International Conference on Machine Learning*, pages 14902–14929.  
460 PMLR, 2023.

461 Su Jia, Peter Frazier, and Nathan Kallus. Multi-armed bandits with interference. *arXiv preprint*  
462 *arXiv:2402.01845*, 2024.

463 Junpei Komiyama, Junya Honda, and Hiroshi Nakagawa. Optimal regret analysis of thompson  
464 sampling in stochastic multi-armed bandit problem with multiple plays. In *International Conference*  
465 *on Machine Learning*, pages 1152–1161. PMLR, 2015.

466 Junpei Komiyama, Junya Honda, and Akiko Takeda. Position-based multiple-play bandit problem  
467 with unknown position bias. *Advances in Neural Information Processing Systems*, 30, 2017.

468 Branislav Kveton, Zheng Wen, Azin Ashkan, and Csaba Szepesvari. Combinatorial cascading bandits.  
469 *Advances in Neural Information Processing Systems*, 28, 2015.

470 Paul Lagr  e, Claire Vernade, and Olivier Cappe. Multiple-play bandits in the position-based model.  
471 *Advances in Neural Information Processing Systems*, 29, 2016.

472 Tor Lattimore and Csaba Szepesv  ri. Bandit algorithms. 2020a.

473 Tor Lattimore and Csaba Szepesv  ri. *Bandit algorithms*. Cambridge University Press, 2020b.

474 Michael P Leung. Causal inference under approximate neighborhood interference. *Econometrica*, 90  
475 (1):267–293, 2022a.

476 Michael P Leung. Rate-optimal cluster-randomized designs for spatial interference. *The Annals of*  
477 *Statistics*, 50(5):3064–3087, 2022b.

478 Michael P Leung. Network cluster-robust inference. *Econometrica*, 91(2):641–667, 2023.

479 Chuanhao Li and Hongning Wang. Communication efficient federated learning for generalized linear  
480 bandits. *arXiv preprint arXiv:2202.01087*, 2022.

481 Shuai Li, Baoxiang Wang, Shengyu Zhang, and Wei Chen. Contextual combinatorial cascading  
482 bandits. In *International conference on machine learning*, pages 1245–1253. PMLR, 2016.

483 Biyonka Liang and Iavor Bojinov. An experimental design for anytime-valid causal inference on  
484 multi-armed bandits. *arXiv preprint arXiv:2311.05794*, 2023.

485 Jonathan Lou  dec, Max Chevalier, Josiane Mothe, Aur  lien Garivier, and S  bastien Gerchinovitz. A  
486 multiple-play bandit algorithm applied to recommender systems. In *The Twenty-Eighth Interna-*  
487 *tional Flairs Conference*, 2015.

488 Alexander R Luedtke and Mark J Van Der Laan. Statistical inference for the mean outcome under a  
489 possibly non-unique optimal treatment strategy. *Annals of statistics*, 44(2):713, 2016.

490 Ka Ho Mok, Yeun-Wen Ku, and Tauchid Komara Yuda. Managing the covid-19 pandemic crisis and  
491 changing welfare regimes, 2021.

492 Evan Munro, Stefan Wager, and Kuang Xu. Treatment effects in market equilibrium. *arXiv preprint*  
493 *arXiv:2109.11647*, 2021.

494 Elizabeth Levy Paluck, Hana Shepherd, and Peter M Aronow. Changing climates of conflict: A  
495 social network experiment in 56 schools. *Proceedings of the National Academy of Sciences*, 113  
496 (3):566–571, 2016.

497 Lijing Qin, Shouyuan Chen, and Xiaoyan Zhu. Contextual combinatorial bandit and its application  
498 on diversified online recommendation. In *Proceedings of the 2014 SIAM International Conference*  
499 *on Data Mining*, pages 461–469. SIAM, 2014.

500 Donald B. Rubin. Randomization analysis of experimental data: The fisher randomization test  
501 comment. *Journal of the American Statistical Association*, 75:591–593, 1980.

502 Donald B Rubin. Causal inference using potential outcomes: Design, modeling, decisions. *Journal*  
503 *of the American Statistical Association*, 100(469):322–331, 2005.

504 Aadirupa Saha and Aditya Gopalan. Combinatorial bandits with relative feedback. *Advances in*  
505 *Neural Information Processing Systems*, 32, 2019.

506 Fredrik S  vje. Causal inference with misspecified exposure mappings: separating definitions and  
507 assumptions. *Biometrika*, 111(1):1–15, 2024.

508 Jasjeet S Sekhon. Opiates for the matches: Matching methods for causal inference. *Annual Review of*  
509 *Political Science*, 12(1):487–508, 2009.

510 David Simchi-Levi and Chonghuan Wang. Multi-armed bandit experimental design: Online decision-  
511 making and adaptive inference. *Management Science*, 2024. doi: 10.1287/mnsc.2023.00492.

512 Bal  zs Sz  r  nyi, R  bert Busa-Fekete, Istv  n Heged  s, R  bert Orm  ndi, M  rk Jelasity, and Bal  zs  
513 K  gl. Gossip-based distributed stochastic bandit algorithms. In *International Conference on*  
514 *Machine Learning*, 2013.

515 Taishi Uchiya, Atsuyoshi Nakamura, and Mineichi Kudo. Algorithms for adversarial bandit problems  
516 with multiple plays. In *International Conference on Algorithmic Learning Theory*, pages 375–389.  
517 Springer, 2010.

518 Davide Viviano, Lihua Lei, Guido Imbens, Brian Karrer, Okke Schrijvers, and Liang Shi. Causal clus-  
519 tering: design of cluster experiments under network interference. *arXiv preprint arXiv:2310.14983*,  
520 2023.

521 Yuanhao Wang, Jiachen Hu, Xiaoyu Chen, and Liwei Wang. Distributed bandit learning: Near-optimal  
522 regret with efficient communication. *arXiv preprint arxiv: 1904.06309*, 2019.

523 Zichen Wang, Rishab Balasubramanian, Hui Yuan, Chenyu Song, Mengdi Wang, and Huazheng  
524 Wang. Adversarial attacks on online learning to rank with stochastic click models. *arXiv preprint*  
525 *arXiv:2305.19218*, 2023a.

526 Zichen Wang, Chuanhao Li, Chenyu Song, Lianghui Wang, Quanquan Gu, and Huazheng Wang.  
527 Pure exploration in asynchronous federated bandits. *arXiv preprint arXiv:2310.11015*, 2023b.

528 Qingyun Wu, Huazheng Wang, Quanquan Gu, and Hongning Wang. Contextual bandits in a  
529 collaborative environment. *Proceedings of the 39th International ACM SIGIR conference on*  
530 *Research and Development in Information Retrieval*, 2016.

531 Yang Xu, Wenbin Lu, and Rui Song. Linear contextual bandits with interference. *arXiv preprint*  
532 *arXiv:2409.15682*, 2024.

533 Fanny Yang, Aaditya Ramdas, Kevin G Jamieson, and Martin J Wainwright. A framework for multi-a  
534 (rmed)/b (andit) testing with online fdr control. *Advances in Neural Information Processing*  
535 *Systems*, 30, 2017.

536 Jiayu Yao, Emma Brunskill, Weiwei Pan, Susan Murphy, and Finale Doshi-Velez. Power constrained  
537 bandits. In *Machine Learning for Healthcare Conference*, pages 209–259. PMLR, 2021.

538 Kelly Zhang, Lucas Janson, and Susan Murphy. Inference for batched bandits. *Advances in Neural*  
539 *Information Processing Systems*, 33:9818–9829, 2020.

540 Kelly Zhang, Lucas Janson, and Susan Murphy. Statistical inference with m-estimators on adaptively  
541 collected data. *Advances in Neural Information Processing Systems*, 34:7460–7471, 2021.

542 Yi Zhang and Kosuke Imai. Individualized policy evaluation and learning under clustered network  
543 interference. *arXiv preprint arXiv:2311.02467*, 2023.

544 Datong Zhou and Claire Tomlin. Budget-constrained multi-armed bandits with multiple plays. In  
545 *Proceedings of the AAAI Conference on Artificial Intelligence*, volume 32, 2018.

## A Technical Appendices and Supplementary Material

Appendix B summarizes key symbols in the main text for reference.  
 Appendix C provides a detailed literature review for better comprehension of the background.  
 Appendix D and N provide the justification for exposure mapping and model conditions.  
 Appendix E illustrates the experiments.  
 Appendix F further analyzes the structure of the exposure mapping and the re-scaled noise.  
 Appendix G provides the proof the Proposition 1.  
 Appendix H-I contain the proof of Theorem 1 and Theorem 2, respectively.  
 Appendix K presents the proofs of Theorem 3-1 in Section 5.  
 Appendix L provides an algorithm for Non-stochastic Settings.  
 Appendix M delivers the proof of Theorem 5. Finally, Appendix O includes the auxiliary lemmas.

## B Notations

|                          |                                                                              |
|--------------------------|------------------------------------------------------------------------------|
| $\mathcal{K}$            | Real arm set                                                                 |
| $K$                      | Number of arms                                                               |
| $\mathcal{U}$            | Unit set                                                                     |
| $N$                      | Number of units                                                              |
| $\mathcal{C}$            | Cluster set                                                                  |
| $C$                      | Number of clusters                                                           |
| $\nu$                    | Instance                                                                     |
| $\mathcal{E}_0$          | Set of the legitimate instance                                               |
| $\pi$                    | Learning policy                                                              |
| $\mathcal{R}(T, \pi)$    | Cumulative regret of policy $\pi$                                            |
| $T$                      | Time horizon                                                                 |
| $T_1$                    | Length of the first exploration phase                                        |
| $Y_i(\cdot)$             | Potential outcome of unit $i$                                                |
| $\tilde{Y}_i(\cdot)$     | Exposure potential outcome of unit $i$                                       |
| $\mathbf{S}(\cdot)$      | Exposure mapping                                                             |
| $\mathbb{H}$             | Adjacency matrix                                                             |
| $a_{i,t}$                | Action of unit $i$                                                           |
| $s_{i,t}$                | Exposure action of unit $i$                                                  |
| $A_t$                    | Supper arm played $t$                                                        |
| $S_t$                    | Exposure super arm played $t$                                                |
| $S^*$                    | Optimal exposure super arm                                                   |
| $d_s$                    | Number of the exposure arm                                                   |
| $\mathcal{U}_s$          | Exposure arm set                                                             |
| $\mathcal{U}_C$          | Cluster-wise switchback exposure super arm set                               |
| $\mathcal{U}_O$          | Set of exposure supper arm that can be triggered by real supper arm          |
| $\mathcal{U}_E$          | Legitimate exposure super arm set                                            |
| $\tilde{r}_{i,t}(S)$     | Reward feedback of unit $i$ in round $t$ if exposure super arm $S$ is pulled |
| $\Delta^{(i,j)}$         | ATE between $S_i$ and $S_j$                                                  |
| $\Delta^i$               | ATE between $S^*$ and $S_i$                                                  |
| $\hat{\Delta}_T^{(i,j)}$ | Estimated ATE between $S_i$ and $S_j$                                        |
| $\hat{R}_t(S)$           | Reward estimator of exposure super arm $S$                                   |
| $e_\nu(T, \hat{\Delta})$ | Largest ATE estimation error                                                 |
| $\mathcal{N}_S^t$        | Observation number of exposure super arm $S$ until round $t$                 |

## C Literature Review

In this section, we present a literature review on network interference within the causality and bandit communities. Additionally, we discuss relevant variants of bandit problems. Finally, we provide a brief summary of recent advancements in the estimation-regret trade-off within the context of MAB.

**Offline causality estimation under network interference.** In the current causality literature, interference is a well-known concept. It is a violation of the conventional ‘‘SUTVA’’ setting, repre-

| Interference-based MAB      | Exposure mapping ( $\mathcal{S}(i, A, \mathbb{H})$ ) | Action space ( $ \mathcal{U}_{\mathcal{E}} $ ) | Clusters ( $\mathcal{C}$ ) | Estimation goal ( $\Delta^{(i,j)}$ )                                                          |
|-----------------------------|------------------------------------------------------|------------------------------------------------|----------------------------|-----------------------------------------------------------------------------------------------|
| Simchi-Levi and Wang [2024] | $A$                                                  | $K$                                            | 1                          | $Y(A_i) - Y(A_j)$                                                                             |
| Jia et al. [2024]           | $Ae_i$                                               | $K$                                            | 1                          | $\frac{1}{N} \sum_{i' \in \mathcal{U}} (Y_{i'}(i * \mathbf{1}_N) - Y_{i'}(j * \mathbf{1}_N))$ |
| Agarwal et al. [2024]       | $Ae_i$                                               | $K^N$                                          | $N$                        | $\frac{1}{N} \sum_{i' \in \mathcal{U}} (Y_{i'}(A_i) - Y_{i'}(A_j))$                           |
| MAB-N (Ours)                | General $\mathcal{S}(i, A, \mathbb{H})$              | $O( d_s ^C)$                                   | $C$                        | $\frac{1}{N} \sum_{i' \in \mathcal{U}} (\bar{Y}_{i'}(S_i) - \bar{Y}_{i'}(S_j))$               |

Table 1: MAB-N surrogates the previous bandit under interference as special cases. Here  $A_i, A_j \in \mathcal{K}^{\mathcal{U}}$ , and  $S_i, S_j \in \mathcal{U}_{\mathcal{E}}$ . We omit the subscript in Simchi-Levi and Wang [2024] since it only considers sole individual.

565 senting that one individual’s treatment would potentially affect another individual’s outcome, which  
566 is relevant in practice. Current literature resort to clustering Zhang and Imai [2023], Viviano et al.  
567 [2023] or exposure mapping Leung [2022a,b, 2023].

568 **Bandit under network interference.** Previous attempts are being made to consider the multi-armed  
569 bandit problem upon network interference. Agarwal et al. [2024] conduct the Fourier analysis to  
570 transform the traditional stochastic multi-armed bandit into a sparse linear bandit. However, in  
571 order to reduce the exponential action space, they made a strong assumption of sparsity for network  
572 structures, i.e., the number of neighbors of each node is manually upper limited. On the other hand, Jia  
573 et al. [2024] analyzes the action space at the other extreme that considers an adversarial bandit setting  
574 and thus forces each node to a simultaneous equal arm. It does not consider that the optimal arm  
575 could differ for each node or subgroup. Moreover, Xu et al. [2024] further considers the contextual  
576 setting under the specific linear structure between the potential outcome and the interference intensity.

577 **Trade-off between inference (estimation) and regret.** A significant body of research has been  
578 dedicated to developing statistical methods for inference in MABs. Numerous studies focus on  
579 deriving statistical tests or central limit theorems for MABs while ensuring that the bandit algorithm  
580 remains largely unaltered [Hadad et al., 2021, Luedtke and Van Der Laan, 2016, Deshpande et al.,  
581 2023, Zhang et al., 2020, 2021, Han et al., 2022, Dimakopoulou et al., 2017, 2019, 2021], thereby  
582 facilitating aggressive regret minimization. However, these works all rely on the SUTVA assumption  
583 and fail to account for potential interference between units.

584 Previous literature upon adaptive inference in multi-armed bandits include Dimakopoulou et al.  
585 [2021], Liang and Bojinov [2023] whereas without strict trade-off analysis. To our best knowledge,  
586 the only state-of-the-art trade-off result is primarily constructed by Simchi-Levi and Wang [2024]  
587 whereas also be cursed by the SUTVA assumption without a network connection. Moreover, Duan  
588 et al. [2024] argue that such Pareto-optimality could be further improved, i.e., the regret and estimation  
589 error could simultaneously achieve their optimality, if additionally assuming the “covariate diversity”  
590 of each node without network interference. Stepping forward, when we shift our attention to the  
591 network setting, Jia et al. [2024] is also intuitively aware of the potential “incompatibility” of decision-  
592 making and statistical inference: specifically, Jia et al. [2024] emphasizes that the truncated HT  
593 estimator directly into the policy learning system is no longer robust because policy learning gives  
594 different propensity probabilities to different arms, making the propensity score more extreme.

595 **Relevant bandit variants: multiple-play bandits, multi-agent bandits, combinatorial bandits,  
596 and multi-tasking bandits.** In bandit literature, the problem where a bandit algorithm plays  
597 multiple arms in each time period has been a subject of study for a long time. Our work is related to  
598 the *multi-play bandit* problem, where the algorithm selects multiple arms in each round and observes  
599 their corresponding reward feedback [Anantharam et al., 1987, Uchiya et al., 2010, Komiyama et al.,  
600 2015, 2017, Lou  dec et al., 2015, Lagr  e et al., 2016, Zhou and Tomlin, 2018, Besson and Kaufmann,  
601 2018, Jia et al., 2023, Wang et al., 2023b]. Additionally, this is related to the *multi-agent bandit*  
602 problem (including distributed and federated bandits), where multiple agents each pull an arm in  
603 every time period. By exchanging observation histories through communication, these agents can  
604 collaboratively accelerate the learning process. [Hillel et al., 2013, Sz  r  nyi et al., 2013, Wu et al.,  
605 2016, Wang et al., 2019, Li and Wang, 2022, He et al., 2022, Wang et al., 2023b]. Furthermore,  
606 our work is also connected to the *combinatorial bandit* problem, where the action set consists of a  
607 subset of the vertices of a binary hypercube [Cesa-Bianchi and Lugosi, 2012, Chen et al., 2013, 2014,  
608 Combes et al., 2015, Qin et al., 2014, Kveton et al., 2015, Li et al., 2016, Saha and Gopalan, 2019,  
609 Wang et al., 2023a]. Some of these works account for interference between units, but they typically

|                      | Estimation (offline)                                                 | Regret (online)                                                | Trade-off between Estimation&Regret               |
|----------------------|----------------------------------------------------------------------|----------------------------------------------------------------|---------------------------------------------------|
| Without interference | SUTVA causality                                                      | Auer et al. [2002]<br>Burtini et al. [2015]                    | Simchi-Levi and Wang [2024]<br>Duan et al. [2024] |
| With interference    | Leung [2022a,b, 2023]<br>Hudgens and Halloran [2008]<br>Sävje [2024] | Agarwal et al. [2024]<br>Jia et al. [2024]<br>Xu et al. [2024] | <b>Our paper</b>                                  |

Table 2: Most related and representative works in causality estimation and regret analysis with (without) network interference.

assume that the interference is either explicitly known to the learning algorithm, or the interference follows a specific pattern. In contrast, our setting makes no such assumptions about the nature or structure of interference between units. Our paper also closely related to the field of multitasking bandits, where the learning algorithm is designed to achieve multiple objectives simultaneously during the learning process. Yang et al. [2017] explore the regulation of the false discovery rate while identifying the best arm. Yao et al. [2021] focus on ensuring the ability to detect whether an intervention has an effect, while also leveraging contextual bandits to tailor consumer actions. Jamieson et al. [2013], Cho et al. [2024] aim to minimize cumulative regret while identifying the best arm with minimal sample complexity.

## D Justification, discussion and future work

**Justification on exposure mapping.** It is a well-known concept in causality. From a statistical perspective, it serves as a functional tool for mapping a high-dimensional action space to a low-dimensional manifold; from a machine learning standpoint, it can be interpreted as a specialized input representation layer. However, its utility has not been fully explored in interference-based online learning settings like Bandits. Interference-based bandit referred to as exposure mapping has recently been explored in Jia et al. [2024] to our knowledge. This additionally assumes the intensity of interference decays with distance. Still, the low-dimensional vectors from their exposure mapping are not involved in the computation of the target regret. In contrast, their regret, directly uses the adversarial setting that “the original super arm must be a vector of the form  $a * \mathbf{1}^N$ ,  $a \in \mathcal{K}$ ”, which is limited in realistic compared to our settings, e.g. when the optimal arm takes place when the individuals in the network are assigned to different treatments; to tackle this problem, although Agarwal et al. [2024] can identify the best arm beyond  $a * \mathbf{1}^N$ ,  $a \in \mathcal{K}$ , their approach relies on a stronger assumption: the rewards of each node are influenced solely by its limited first-order neighbors, and the number of these neighbors is significantly smaller than  $N$ . In sum, our paper first presents an integration of exposure mapping with bandit regret frameworks and demonstrates its generality and applicability.

**Justification on Condition 1.** Condition 1 states that  $\mathcal{U}_\mathcal{E} \geq 2$  is not empty. It is already weaker than the previous interference-based bandit setting [Jia et al., 2024, Agarwal et al., 2024] whereas it could be further relaxed. We consider the generalized metric to describe the distance between  $\mathcal{U}_\mathcal{O}$  and  $S_t \in \mathcal{U}_\mathcal{C}$ :  $\mathcal{D}(\mathcal{U}_\mathcal{O}, S_t) := \min_{S' \in \mathcal{U}_\mathcal{O}} \|S' - S_t\|_1$  via Manhattan distance. When the number of clusters grows, the action space  $|\mathcal{U}_\mathcal{C}|$  exponentially expands and their compatibility  $\mathcal{D}(\mathcal{U}_\mathcal{C}, \mathcal{U}_\mathcal{O})$  also decreases. These previous literature and Condition 1 all satisfy  $\mathcal{D}(\mathcal{U}_\mathcal{C}, \mathcal{U}_\mathcal{O}) = 0$ , and the former literature together with additional network structure [Agrawal and Goyal, 2012] or interference intensity [Jia et al., 2024] assumption as above. In Appendix N we claim that under the weakened assumption  $\mathcal{D}(\mathcal{U}_\mathcal{C}, \mathcal{U}_\mathcal{O}) \leq \epsilon$ , where  $\epsilon > 0$  is a prior constant, our model remains capable of reasonable modeling by appropriately adjusting the definition of exposure-based rewards accordingly. The interplay between this assumption and other well-known assumptions, such as the neighbor sparsity assumption Agarwal et al. [2024], the decaying interference assumption Jia et al. [2024], and the approximate interference assumption Leung [2022a], is left as an avenue for future work.



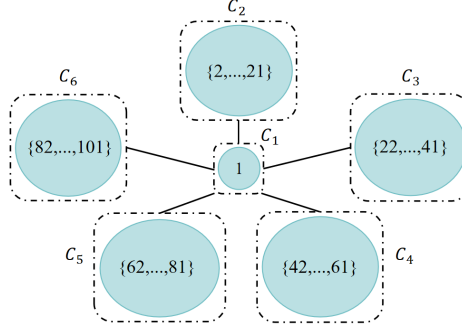

Figure 2: Network structure.

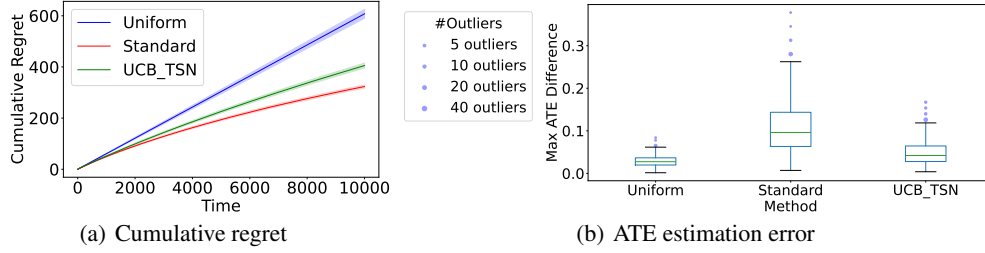

Figure 3: Experimental results.

## E Experiments

Our code is available at: <https://anonymous.4open.science/r/Exposure-Mapping-Stochastic-Network-1533>.

**Setup.** We consider a network consisting of 101 units. Specifically, there is a central cluster  $C_1 = \{1\}$  that contains a single unit, which is connected to every unit in the five peripheral clusters  $C_2, \dots, C_6$  (namely,  $C_2 = \{2, \dots, 21\}$ ,  $C_3 = \{22, \dots, 41\}$ ,  $C_4 = \{42, \dots, 61\}$ ,  $C_5 = \{62, \dots, 81\}$ , and  $C_6 = \{82, \dots, 101\}$ , with each outer cluster containing 20 units, as shown in Fig. 2). We set the action set as  $\mathcal{K} = \{0, 1\}$ . Inspired by [Leung, 2022a, Gao and Ding, 2023], we define the exposure mapping as  $\mathbf{S}(i, A, \mathcal{H}) = \mathbf{1}\left\{\frac{\sum_j h_{ij} a_j}{\sum_j h_{ij}} \in [0, \frac{1}{2})\right\}$ , which explores the influence of the proportion of neighbors taking action 1 on each unit; this exposure mapping implies that  $d_s = 2$ . For every  $S \in \mathcal{U}_{\mathcal{E}}$ , we define  $\mathbb{P}(A_t = A \mid S)$  as uniform sampling. Moreover, for each selected super arm corresponding to an exposure  $S$ , the reward is sampled from a Bernoulli distribution.

We evaluate the performance of UCB-TSN ( $T_1 = \sqrt{|\mathcal{U}_{\mathcal{E}}| T}$ ) against two baseline methods: Standard (i.e., UCB-TSN with  $T_1 = 0$ ) and Uniform (i.e., UCB-TSN with  $T_1 = T$ ). Each algorithm is executed 1000 times, and we report the averaged results.

**Results.** The simulation results are shown in Fig. 3(a) and Fig. 3(b). As seen in Fig. 3(a), both the Standard method and UCB-TSN achieve the lowest cumulative regret, while Uniform exhibits the highest cumulative regret. Fig. 3(b) presents a box plot of the maximum ATE estimation error,  $e_{\nu}(T, \hat{\Delta})$ , where the green line represents the median. The results indicate that UCB-TSN and Uniform yield lower ATE estimation errors with compact interquartile ranges and few outliers, whereas the Standard method shows a wider spread of errors and multiple outliers. This relatively poorer performance of the Standard method in statistical estimation is due to its lower frequency of exploring sub-optimal arms compared to Uniform and UCB-TSN.

## F The Discussion of Exposure Mapping and Noise Rescaling

We denote the policy and exposure reward inheriting from Leung [2022a] as  $\mathbb{P}_{\text{Leung}}$  and  $\tilde{Y}_{i,\text{Leung}}(\cdot)$ , respectively. Considering Eq (3), we take the exposure mapping function's output as  $d_s$  cardinality without loss of generality. We choose  $\mathbb{P}(A_t = A \mid S_t) := \mathbb{P}_{\text{Leung}}(A_t = A \mid S_t e_i)$  then  $\forall S_t e_i = s$ ,  $\tilde{Y}_{i,\text{Leung}}(s) = \sum_{A \in \mathcal{K}^{\mathcal{U}}} \mathbb{P}_{\text{Leung}}(A_t = A \mid s) Y_i(A) = \sum_{A \in \mathcal{K}^{\mathcal{U}}} \mathbb{P}(A_t = A \mid S_t) Y_i(A) = \tilde{Y}_i(S_t)$ . Hence our exposure-based reward notation is generalized from Leung [2022a].

Moreover, we discuss the re-scaling of noise. When  $\forall S \in \mathcal{U}_{\mathcal{E}}, |\{A : \{\mathbf{S}(i, A, \mathbb{H})\}_{i \in \mathcal{U}} = S\}| = 1$ , it naturally leads to the variance proxy  $\sigma^2 = \frac{1}{N}$  of the Sub-Gaussian variables  $\sum_{i \in \mathcal{U}} \tilde{r}_{i,t}(S)/N$ . Hence, we mainly consider other cases. Notice that Eq (3) defines

$$[\tilde{Y}_i(S_t), \tilde{r}_{i,t}(S_t)]^\top := \sum_{A \in \mathcal{K}^{\mathcal{U}}} [Y_i(A), r_{i,t}(A)]^\top \mathbb{P}(A_t = A \mid S_t),$$

namely, for each  $S_t$ , practitioners select random legitimate  $r_{i,t}(A_t)$  to approximate  $\tilde{r}_{i,t}(S_t)$ , each with probability  $\mathbb{P}(A_t = A \mid S_t)$ . The randomness includes the sub-Gaussian noise and sampling noise. It follows that for all  $m \in \mathbb{R}$ ,

$$\begin{aligned} & \mathbb{E} \left[ \exp \left( \frac{m}{N} \sum_{i \in \mathcal{U}} (\tilde{r}_{i,t}(S_t) - \tilde{Y}_i(S_t)) \right) \mid A_t = A \right] \\ &= \mathbb{E} \left[ \exp \left( \frac{m}{N} \sum_{i \in \mathcal{U}} (r_{i,t}(A) - Y_i(A) + Y_i(A) - \tilde{Y}_i(S_t)) \right) \right] \\ &= \exp \left( \frac{m}{N} \sum_{i \in \mathcal{U}} (Y_i(A) - \tilde{Y}_i(S_t)) \right) \mathbb{E} \left[ \exp \left( \frac{m}{N} \sum_{i \in \mathcal{U}} (r_{i,t}(A) - Y_i(A)) \right) \right] \\ &\leq \exp \left( \frac{m}{N} \sum_{i \in \mathcal{U}} (Y_i(A) - \tilde{Y}_i(S_t)) \right) \exp \left( \frac{m^2}{2N} \right). \end{aligned} \quad (8)$$

Taking expectation upon both sides of Eq (8), it leads to

$$\mathbb{E} \left[ \mathbb{E} \left[ \exp \left( \frac{m}{N} \sum_{i \in \mathcal{U}} (\tilde{r}_{i,t}(S_t) - \tilde{Y}_i(S_t)) \right) \mid A_t = A \right] \right] \leq \exp \left( \frac{m^2}{2N} \right) \mathbb{E} \left[ \exp \left( \frac{m}{N} \sum_{i \in \mathcal{U}} (Y_i(A) - \tilde{Y}_i(S_t)) \right) \right]. \quad (9)$$

According to the boundary  $\frac{1}{N} \sum_{i \in \mathcal{U}} (Y_i(A) - \tilde{Y}_i(S_t)) \in [-1, 1]$ , it is natural to derive

$$\mathbb{E} \left[ \exp \left( \frac{m}{N} \sum_{i \in \mathcal{U}} (Y_i(A) - \tilde{Y}_i(S_t)) \right) \right] \leq \cosh(m/2) \leq \exp(m^2/8).$$

Then Eq (9) achieves that

$$(9) \leq \exp \left( \frac{m^2}{2N} \right) \exp(m^2/8) = \exp \left( \frac{m^2}{2} \left( \frac{1}{N} + \frac{1}{4} \right) \right). \quad (10)$$

Therefore the Sub-Gaussian variables  $\sum_{i \in \mathcal{U}} \tilde{r}_{i,t}(S)/N$  could achieve the variance proxy at most  $1/N + 1/4$ . In the following part, we set the variance proxy as  $\sigma^2 = 2$  without loss of generality.

**Comment on the order of node number  $N$ .** For a supplement, in Theorem/Corollary 3-1, we additionally consider the order of node number  $N$ . (i) In Theorem 3, we emphasize that if  $\forall S' \in \mathcal{U}_{\mathcal{E}}, |\{A : \{\mathbf{S}(i, A, \mathbb{H})\}_{i \in \mathcal{U}} = S'\}| = 1$ , namely, there is only one legitimate  $A$  which is compatible with each exposure arm  $S'$ , then Theorem 3 could be strengthened as  $\mathbb{E}[\|\hat{\Delta}_T^{(i,j)} - \Delta^{(i,j)}\|] = \tilde{O}(\sqrt{|\mathcal{U}_{\mathcal{E}}|/T_1 N})$ . Take the cluster-wise switchback experiment ( $S(i, A, \mathbb{H}) = a_{i,t}$ ) for instance, which is the generalized case of Jia et al. [2024]. In this case, since  $|\mathcal{U}_{\mathcal{E}}| = K^C \ll N$  via manually selecting  $d_s, C$ , then we can claim the estimation is consistent when  $N \rightarrow +\infty$ <sup>7</sup>. Moreover, in the

<sup>7</sup>Essentially, it is due to the re-scaling of noise. Under the one-to-one mapping in this paragraph, the result is intuitive since  $\sum_{i \in \mathcal{U}} \tilde{r}_{i,t}(S)/N$  exhibits a re-scaled Sub-Gaussian noise with variance proxy  $1/N$ . It degenerates to the offline setting when  $N \rightarrow +\infty$ . Otherwise, we could only ensure  $\sum_{i \in \mathcal{U}} \tilde{r}_{i,t}(S)/N$  is a Sub-Gaussian noise with variance proxy  $(1/N + 1/4)$ . We defer the details to Appendix F.

696 setting of Agarwal et al. [2024], it is equivalent to the case  $C = N$  and thus the result in Theorem 3  
 697 is transformed as  $\tilde{O}(\sqrt{K^N/T_1 N})$ . It serves as a supplement of Proposition 1, claiming that not only  
 698 the regret but also the estimation error is hard to control without exposure mapping. (ii) Analogously,  
 699 in Theorem 4, the result is transformed to  $\mathcal{R}_\nu(T, \pi) = \tilde{O}(\sqrt{|\mathcal{U}_\mathcal{E}|T/N} + T_1)$  under the above one-to-  
 700 one mapping. (iii) Finally, in Corollary 1, the trade-off is transferred to be  $\tilde{O}(\sqrt{|\mathcal{U}_\mathcal{E}|/N})$  when we  
 701 slightly modify the condition of  $T_1$  as  $T_1 \geq \sqrt{|\mathcal{U}_\mathcal{E}|T/N} \vee |\mathcal{U}_\mathcal{E}|$ . This result is also aligned with the  
 702 proof of Theorem 1.

## 703 G Proof of Proposition 1

704 **Proof 1 (Proof of Proposition 1)** We here define  $\mathcal{K}^\mathcal{U} := \{A_k\}_{k=1}^{K^N}$  as the set of the super arm. Define  
 705 a MAB instance  $\nu_1 \in \mathcal{E}_0$  that  $Y_i(A) = \Delta \mathbf{1}\{A = A_1\}$  for all  $i \in \mathcal{U}$  and  $A \in \mathcal{K}^\mathcal{U}$ , where  $\Delta \in [0, 1/2]$   
 706 will be defined later. We suppose that the noise of all unit  $\eta_{i,t}$  follows a  $\mathcal{N}(0, 1)$  Gaussian distribution,  
 707 and therefore the normalized noise of the super arm  $(1/N) \sum_{i \in \mathcal{U}} \eta_{i,t}$  follows a  $\mathcal{N}(0, 1/N)$  Gaussian  
 708 distribution. Hence, we have  $1/N \sum_{i \in \mathcal{U}} Y_i(A_1) = \Delta$  and  $1/N \sum_{i \in \mathcal{U}} Y_i(A_k) = 0$  for all  $k \in$   
 709  $[K^N]/\{1\}$ . This implies in  $\nu_1$ ,  $A_1 = A^*$  is the best arm with potential outcome  $\Delta$  and  $A \neq A_1$  is  
 710 the sub-optimal arm with potential outcome 0. Due to

$$\mathcal{R}_{\nu_1}(T, \pi) = \sum_{k=2}^{K^N} \Delta_k \mathbb{E}_{\nu_1, \pi}[\mathcal{N}_{A_k}^T], \quad (11)$$

711 where  $\mathcal{N}_{A_k}^T := \sum_{t \in [T]} \mathbf{1}\{A_t = A_k\}$  denotes the number that super arm  $A_k$  is trigger till  $T$  and  $\Delta_k$   
 712 denotes the reward gap between super arm  $A_1$  and  $A_k$  (i.e.,  $\Delta_k = (1/N)(\sum_{i \in \mathcal{U}} Y_i(A_1) - Y_i(A_k))$ ).  
 713 Suppose the super arm  $A_j$ ,  $j = \arg \min_{j \in [K^N]/\{1\}} \mathbb{E}_{\nu_1, \pi}[\mathcal{N}_{A_j}^T]$ , then

$$\mathbb{E}_{\nu_1, \pi}[\mathcal{N}_{A_j}^T] \leq \frac{T}{K^N - 1}. \quad (12)$$

714 Besides, we define another  $\mathcal{N}(0, 1)$  Gaussian MAB instance  $\nu_2 \in \mathcal{E}_0$ , where  $Y'_i(A) = Y_i(A) +$   
 715  $2\Delta \mathbf{1}\{A = A_j\}$  for all  $i \in \mathcal{U}$  and  $A \in \mathcal{K}^\mathcal{U}$ . In  $\nu_2$ ,  $A_j$  is the best arm with potential outcome  $2\Delta$ .  
 716 Based on the decomposition of the regret Eq (11), we have

$$\mathcal{R}_{\nu_1}(T, \pi) \geq \mathbb{P}_{\nu_1, \pi}(\mathcal{N}_{A_1}^T \leq T/2) \frac{\Delta T}{2}, \quad \text{and} \quad \mathcal{R}_{\nu_2}(T, \pi) \geq \mathbb{P}_{\nu_2, \pi}(\mathcal{N}_{A_1}^T \geq T/2) \frac{\Delta T}{2}. \quad (13)$$

717 Let  $\mathbb{P}_{\nu_1, \pi}$  and  $\mathbb{P}_{\nu_2, \pi}$  denote the probability measures on the canonical bandit model induced by the  
 718  $T$ -round interaction between  $\pi$  and  $\nu_1$ , and  $\pi$  and  $\nu_2$ , respectively. Finally, we have

$$\begin{aligned} & \mathcal{R}_{\nu_1}(T, \pi) + \mathcal{R}_{\nu_2}(T, \pi) \\ & \geq \left( \mathbb{P}_{\nu_1, \pi}(\mathcal{N}_{A_1}^T \geq T/2) + \mathbb{P}_{\nu_2, \pi}(\mathcal{N}_{A_1}^T < T/2) \right) \frac{\Delta T}{2} \\ & \geq \exp\left(-KL(\mathbb{P}_{\nu_1, \pi}, \mathbb{P}_{\nu_2, \pi})\right) \frac{\Delta T}{4} \\ & \geq \exp\left(-\mathbb{E}_{\nu_1, \pi}[\mathcal{N}_{A_j}^T] KL(\mathcal{N}(0, 1/N), \mathcal{N}(2\Delta, 1/N))\right) \frac{\Delta T}{4} \\ & \geq \exp\left(-\mathbb{E}_{\nu_1, \pi}[\mathcal{N}_{A_j}^T] 2N\Delta^2\right) \frac{\Delta T}{4} \\ & \geq \exp\left(-\frac{2TN\Delta^2}{K^N - 1}\right) \frac{\Delta T}{4}, \end{aligned} \quad (14)$$

719 where  $KL$  denotes the KL divergence, the second inequality is owing to the Bretagnolle–Huber  
 720 inequality, the third inequality is due to the Lemma 15.1 in Lattimore and Szepesvári [2020b], the  
 721 fourth inequality is due to the definition of the noise distribution (i.e.,  $\mathcal{N}(0, 1/N)$ ) of the super arm.

722 Finally, select  $\Delta = \sqrt{\frac{K^N - 1}{4TN}} \wedge \frac{1}{2}$ , based on the above result, we have ( $i = 1$  or  $2$ )

$$\mathcal{R}_{\nu_i}(T, \pi) \geq \begin{cases} e^{-1/2} \frac{T}{8\sqrt{N}}, & \text{when } T \leq K^N \\ \frac{e^{-1/2}}{4} \sqrt{\frac{(K^N - 1)T}{N}}, & \text{when } T \geq K^N. \end{cases} \quad (15)$$

## H Proof of Theorem 1

**Proof 2 (Proof of Theorem 1)** In this section, to simplify the notations in Section G, we abbreviate  $\mathbb{P}_{\nu, \pi}$  as  $\mathbb{P}_\nu$  and  $\mathbb{E}_{\nu, \pi}$  as  $\mathbb{E}_\nu$ . We consider two kinds of instances for a fixed policy  $\pi$  and a fixed strategy of constructing an ATE estimator  $\hat{\Delta}_T$ . For the first one (i.e.,  $\nu_1$ ), we denote it as  $r_{i,t}(A) = f_i(A) + \eta_{i,t}$ . Here we let  $Y_i(A) := f_i(A) \in [0, 1]$ ,  $r_{i,t}(A) \in \{-1, 1\}$ . It means  $r_{i,t}(A) = \text{Rad}(\frac{1-f_i(A)}{2}, \frac{1+f_i(A)}{2})$ . For each feasible cluster-wise exposure super arm  $S \in \mathcal{U}_\mathcal{E}$ , recall that

$$\tilde{Y}_i(S) = \sum_{A \in \mathcal{K}^\mathcal{U}} f_i(A) \mathbb{P}(A_t = A | S). \quad (16)$$

The difference of expected reward of  $S, S'$  could be represented by  $\Delta_1(S, S') := \frac{1}{N} \sum_{i \in \mathcal{U}} (\tilde{Y}_i(S) - \tilde{Y}_i(S'))$ , which is

$$\Delta_1(S, S') = \frac{1}{N} \sum_{i \in \mathcal{U}} \sum_{A \in \mathcal{K}^\mathcal{U}} f_i(A) (\mathbb{P}(A_t = A | S) - \mathbb{P}(A_t = A | S')). \quad (17)$$

Without loss of generality, we select the feasible super arm to set  $\Delta_1(S, S') < 0$ . For brevity, we omit the expression of the parentheses in the following text. Namely, we choose  $S'$  as the best arm, and  $S$  as a sub-optimal arm in  $\mathcal{U}_\mathcal{E}$ . We choose  $S = \arg \min_{S_i \in \mathcal{U}_\mathcal{E}, S_i \neq S'} \Delta_1(S_i, S') \mathbb{E}_{\nu_1}[\mathcal{N}_{S_i}^T]$ . In this process, we use  $\hat{\Delta}^{(i,j)} := \{\hat{\Delta}_t^{(i,j)}\}_{t \geq 1}$ ,  $\hat{\Delta} := \{\hat{\Delta}^{(i,j)}\}_{S_i, S_j \in \mathcal{U}_\mathcal{E}}$ . We then construct a new MAB instance  $\nu_2$  and hope to get a different ATE value. We define it as  $r'_{i,t}(A)$ . We establish :

$$r'_{i,t}(A) := \begin{cases} r_{i,t}(A) & \forall A \text{ satisfying } \mathbb{P}(A_t = A | S) = 0. \\ \text{Rad}(\frac{1-f_i(A)+\alpha}{2}, \frac{1+f_i(A)-\alpha}{2}) & \forall A \text{ satisfying } \mathbb{P}(A_t = A | S) > 0. \end{cases} \quad (18)$$

Here  $\alpha > 0$  should be chosen sufficiently small. Remind that following Eq (17), the ATE between super arm  $S, S'$  is

$$\begin{aligned} \Delta_2 &:= \Delta_{2,1} + \Delta_{2,2}, \text{ where} \\ \Delta_{2,1} &:= \frac{1}{N} \sum_{i \in \mathcal{U}} \sum_{A \in \mathcal{K}^\mathcal{U}} (f_i(A) - \alpha) (\mathbb{P}(A_t = A | S) - \mathbb{P}(A_t = A | S')) \mathbf{1}\{\mathbb{P}(A_t = A | S) > 0\}, \\ \Delta_{2,2} &:= \frac{1}{N} \sum_{i \in \mathcal{U}} \sum_{A \in \mathcal{K}^\mathcal{U}} f_i(A) (\mathbb{P}(A_t = A | S) - \mathbb{P}(A_t = A | S')) \mathbf{1}\{\mathbb{P}(A_t = A | S) = 0\}. \end{aligned}$$

Hence, it implies that the ATEs in these two MAB instances, respectively, contain a difference

$$\begin{aligned} \Delta_2 - \Delta_1 &= \frac{1}{N} \sum_{i \in \mathcal{U}} \sum_{A \in \mathcal{K}^\mathcal{U}} -\alpha (\mathbb{P}(A_t = A | S) - \mathbb{P}(A_t = A | S')) \mathbf{1}\{\mathbb{P}(A_t = A | S) > 0\} \\ &= \frac{1}{N} \sum_{i \in \mathcal{U}} \sum_{A \in \mathcal{K}^\mathcal{U}} -\alpha \mathbb{P}(A_t = A | S) \mathbf{1}\{\mathbb{P}(A_t = A | S) > 0\} \\ &= \frac{1}{N} \sum_{i \in \mathcal{U}} \sum_{A \in \mathcal{K}^\mathcal{U}} -\alpha \mathbb{P}(A_t = A | S) = -\alpha < 0. \end{aligned} \quad (19)$$

Naturally, our setting leads to  $0 > \Delta_1 > \Delta_2$ . The second equality is because  $\mathbb{P}(A_t = A | S) \mathbb{P}(A_t = A | S') = 0$  when  $S \neq S'$ . In this sense, we consider a given estimate strategy, which is summarized by  $\{\hat{\Delta}_{t'}\}_{t' \in [t]}$ . We define a minimum test  $\psi(\hat{\Delta}_t) = \arg \min_{i \in \{1, 2\}} |\hat{\Delta}_t - \Delta_i|$ . Naturally, it implies that  $\psi(\hat{\Delta}_t) \neq i, i \in \{1, 2\}$  is a sufficient condition of  $|\hat{\Delta}_t - \Delta_i| \geq \frac{\alpha}{2}$ . As a consequence,

$$\begin{aligned} \inf_{\hat{\Delta}_t} \max_{\nu \in \mathcal{E}_0} \mathbb{P}_\nu \left( |\hat{\Delta}_t - \Delta_\nu| \geq \frac{\alpha}{2} \right) &\geq \inf_{\hat{\Delta}_t} \max_{i \in \{1, 2\}} \mathbb{P}_{\nu_i} \left( |\hat{\Delta}_t - \Delta_i| \geq \frac{\alpha}{2} \right) \\ &\geq \inf_{\hat{\Delta}_t} \max_{i \in \{1, 2\}} \mathbb{P}_{\nu_i} \left( \psi(\hat{\Delta}_t) \neq i \right) \\ &\geq \inf_{\psi} \max_{i \in \{1, 2\}} \mathbb{P}_{\nu_i} (\psi \neq i). \end{aligned} \quad (20)$$

743 Here, the probability space is constructed on the exposure arm  $\{\mathbf{S}(i, A, \mathbb{H})\}_{i \in \mathcal{U}}$  in each time period  $t$ ,  
 744 and the observed exposure reward. We use the technique in min-max bound. Notice that the original  
 745 feasible region of MAB instances as  $\mathcal{E}_0$ ; we get

$$\begin{aligned} \text{RHS of (20)} &\geq \frac{1}{2} \inf_{\psi} (\mathbb{P}_{\nu_1}(\psi = 2) + \mathbb{P}_{\nu_2}(\psi = 1)) \\ &= \frac{1}{2} (1 - TV(\mathbb{P}_{\nu_1}, \mathbb{P}_{\nu_2})) \\ &\geq \frac{1}{2} \left[ 1 - \sqrt{\frac{1}{2} KL(\mathbb{P}_{\nu_1}, \mathbb{P}_{\nu_2})} \right]. \end{aligned} \quad (21)$$

746 We aim to provide an upper bound of KL divergence  $KL(\mathbb{P}_{\nu_1}, \mathbb{P}_{\nu_2})$ , inspired by the divergence  
 747 decomposition:

$$KL(\mathbb{P}_{\nu_1}, \mathbb{P}_{\nu_2}) = \mathbb{E}_{\nu_2} \left[ \log \left( \frac{d\mathbb{P}_{\nu_1}}{d\mathbb{P}_{\nu_2}} \right) \right]. \quad (22)$$

748 For any instance  $\nu \in \{\nu_1, \nu_2\}$ , the density function of the series is denoted as (we denote  $X_t$  as the  
 749 observed exposure reward  $\{\tilde{r}_{i,t}(S)\}_{i \in \mathcal{U}}$ )

$$\mathbb{P}_{\nu}(S_1, X_1, \dots, S_t, X_t) = \prod_{t'=1}^t \pi_t(S_t \mid S_1, X_1, \dots, S_{t'-1}, X_{t'-1}) \mathbb{P}_{\nu, S_t}(X_t). \quad (23)$$

750 Here  $\mathbb{P}_{\nu, S}(\cdot)$  denotes the reward density distribution conditioning on arm  $S$  in  $\nu$ . Hence Eq (22) can  
 751 be transformed as

$$\begin{aligned} KL(\mathbb{P}_{\nu_1}, \mathbb{P}_{\nu_2}) &= \sum_{t' \in [t]} \mathbb{E}_{\nu_1} \log \left( \frac{\mathbb{P}_{\nu_1, S_{t'}}(X_{t'})}{\mathbb{P}_{\nu_2, S_{t'}}(X_{t'})} \right) \\ &= \sum_{t' \in [t]} \mathbb{E}_{\nu_1} \left[ \mathbb{E}_{\nu_1} \log \left( \frac{\mathbb{P}_{\nu_1, S_{t'}}(X_{t'})}{\mathbb{P}_{\nu_2, S_{t'}}(X_{t'})} \right) \mid S_{t'} \right] \\ &= \sum_{t' \in [t]} \mathbb{E}_{\nu_1} [KL(\mathbb{P}_{\nu_1, S_{t'}}(\cdot), \mathbb{P}_{\nu_2, S_{t'}}(\cdot))] \\ &= \mathbb{E}_{\nu_1} [\mathcal{N}_S^t] KL(\mathbb{P}_{\nu_1, S}(\cdot), \mathbb{P}_{\nu_2, S}(\cdot)). \end{aligned} \quad (24)$$

752 The last equation is derived from the construction in Eq (18). We aim to compute  
 753  $KL(\mathbb{P}_{\nu_1, S}(\cdot), \mathbb{P}_{\nu_2, S}(\cdot))$ :

$$KL(\mathbb{P}_{\nu_1, S}(\cdot), \mathbb{P}_{\nu_2, S}(\cdot)) = \int_X \mathbb{P}_{\nu_1, S}(X) \log \left( \frac{\mathbb{P}_{\nu_1, S}(X)}{\mathbb{P}_{\nu_2, S}(X)} \right) dX \leq qN\alpha^2. \quad (25)$$

754 Here  $q$  is a constant via second-order Taylor expansion.

755 As a consequence, it implies that

$$KL(\mathbb{P}_{\nu_1}, \mathbb{P}_{\nu_2}) \leq qN\alpha^2 \mathbb{E}_{\nu_1} [\mathcal{N}_S^t] \leq qN\alpha^2 \frac{\mathcal{R}_{\nu_1}(t, \pi)}{|\mathcal{U}_{\mathcal{E}}| |\Delta_1|}. \quad (26)$$

756 The last inequality is due to  $S := \arg \min_{S_i \in \mathcal{U}_{\mathcal{E}}, S_i \neq S'} \Delta_1(S_i, S') \mathbb{E}_{\nu_1} [\mathcal{N}_{S_i}^t]$ . Combined with  
 757 Eq (20), (21), (26):

$$\inf_{\hat{\Delta}_t} \max_{\nu \in \mathcal{E}_0} \mathbb{P}_{\nu} \left( \max_{i, j \in \mathcal{U}_{\mathcal{E}}} |\hat{\Delta}_t^{(i, j)} - \Delta_{\nu}^{(i, j)}| \geq \frac{\alpha}{2} \right) \geq \frac{1}{2} \left[ 1 - \sqrt{\frac{1}{2} qN\alpha^2 \frac{\mathcal{R}_{\nu_1}(t, \pi)}{|\mathcal{U}_{\mathcal{E}}| |\Delta_1|}} \right]. \quad (27)$$

758 On this basis, we derive the final trade-off as follows:

$$\begin{aligned} &\inf_{\hat{\Delta}_t} \max_{\nu \in \mathcal{E}_0} \mathbb{E}_{\nu} \left( \max_{i, j \in \mathcal{U}_{\mathcal{E}}} |\hat{\Delta}_t^{(i, j)} - \Delta_{\nu}^{(i, j)}| \right) \\ &\geq \frac{\alpha}{2} \inf_{\hat{\Delta}_t} \max_{\nu \in \mathcal{E}_0} \mathbb{P}_{\nu} \left( \max_{i, j \in \mathcal{U}_{\mathcal{E}}} |\hat{\Delta}_t^{(i, j)} - \Delta_{\nu}^{(i, j)}| \geq \frac{\alpha}{2} \right) \\ &\geq \frac{\alpha}{4} \left[ 1 - \alpha \sqrt{\frac{1}{2} qN \frac{\mathcal{R}_{\nu_1}(t, \pi)}{|\mathcal{U}_{\mathcal{E}}| |\Delta_1|}} \right]. \end{aligned} \quad (28)$$

759 As a consequence, when  $t = T$ ,

$$\begin{aligned} & \inf_{\hat{\Delta}_T} \max_{\nu \in \mathcal{E}_0} \mathbb{E}_\nu \left( \max_{i,j \in \mathcal{U}_\mathcal{E}} |\hat{\Delta}_T^{(i,j)} - \Delta_\nu^{(i,j)}| \right) \sqrt{\mathcal{R}_\nu(T, \pi)} \\ & \geq \frac{\alpha}{4} \left[ 1 - \sqrt{\frac{1}{2} q \alpha^2 N \frac{\mathcal{R}_{\nu_1}(T, \pi)}{|\mathcal{U}_\mathcal{E}| |\Delta_1|}} \right] \sqrt{\mathcal{R}_{\nu_1}(T, \pi)}. \end{aligned} \quad (29)$$

760 Due to the sqrt-term spans  $[0, +\infty]$  with  $\alpha \in [0, 1]$ , hence we could set  $q \alpha^2 N \frac{\mathcal{R}_{\nu_1}(T, \pi)}{|\mathcal{U}_\mathcal{E}| |\Delta_1|} = \frac{1}{2}$ , then,  
761 when  $T \geq |\mathcal{U}_\mathcal{E}|$ , it leads to

$$(29) \geq \frac{\alpha}{8} \sqrt{\frac{|\mathcal{U}_\mathcal{E}| |\Delta_1|}{2Nq\alpha^2}} = \Omega_{T,N,K}(\sqrt{\frac{|\mathcal{U}_\mathcal{E}|}{N}}) = \Omega_{T,K}(\sqrt{|\mathcal{U}_\mathcal{E}|}). \quad (30)$$

762 Theorem 2 also follows. Q.E.D.

## 763 I Proof of Theorem 2

764 **Proof 3 (Proof of Theorem 2)** We prove such sufficiency via contradiction. On the one hand,  
765 suppose that the MAB pair  $\{\pi, \hat{\Delta}\}$  satisfies  $\max_{\nu \in \mathcal{E}_0} \left( \sqrt{\mathcal{R}_\nu(T, \pi)} e_\nu(T, \hat{\Delta}) \right) = \tilde{O}(\sqrt{|\mathcal{U}_\mathcal{E}|})$ . If  
766 it is not Pareto-optimal, it is equivalent to claim that there is another pair  $\{\pi', \hat{\Delta}'\}$  to dom-  
767 inate  $\{\pi, \hat{\Delta}\}$ . In this sense, according to Theorem 1, there exists an instance  $\nu'$  such that  
768  $\sqrt{\mathcal{R}_{\nu'}(T, \pi')} e_{\nu'}(T, \hat{\Delta}') = \Omega(\sqrt{|\mathcal{U}_\mathcal{E}|})$ . Moreover, according to the definition of Pareto-dominance,  
769 there further exists another instance  $\nu''$ , such that  $\forall \odot \in \{K, T\}$ ,  $\sqrt{|\mathcal{U}_\mathcal{E}|} \prec_\odot \sqrt{\mathcal{R}_{\nu''}(T, \pi)} e_{\nu''}(T, \hat{\Delta})$ .  
770 It is a contradiction.

**Remark 1** On the other hand, we additionally consider the proof of necessity part, also by contradic-  
tion. It is a rigorous refinement of Theorem.5 in Simchi-Levi and Wang [2024] with the extension  
to the network interference case. We additionally condition that  $\mathcal{R}_\nu(T, \pi)$  and  $e_\nu(T, \hat{\Delta})$  could both  
be lower bounded by a polynomial form of  $T$ , i.e., the Pareto-dominance is only considered in the  
region of  $\mathcal{V}_{\text{lower}} := \{\nu : \mathcal{R}_\nu(T, \pi) = \Omega(T^\alpha), e_\nu(T, \hat{\Delta}) = \Omega(\sqrt{|\mathcal{U}_\mathcal{E}|} T^\beta)\}$ , where  $\alpha > 0, \beta < 0$  are  
constants. Recalling our goal is to prove any Pareto-optimal pair  $\{\pi, \hat{\Delta}\}$  satisfies

$$\max_{\nu \in \mathcal{V}_{\text{lower}}} \left( \sqrt{\mathcal{R}_\nu(T, \pi)} e_\nu(T, \hat{\Delta}) \right) = \tilde{O}(\sqrt{|\mathcal{U}_\mathcal{E}|}).$$

Suppose that for a Pareto-optimal pair, there exist hard instances  $\nu^* \in \mathcal{V}_{\text{hard}} \subseteq \mathcal{V}_{\text{front}} \cap \mathcal{V}_{\text{lower}} \subseteq \mathcal{E}_0$   
such that (here  $\mathcal{V}_{\text{front}} := \{\nu : (\sqrt{\mathcal{R}_\nu(T, \pi)}, e_\nu(T, \hat{\Delta})) \in \mathcal{F}(\pi, \hat{\Delta})\}$ ):

$$\forall \nu^* \in \mathcal{V}_{\text{hard}}, \sqrt{\mathcal{R}_{\nu^*}(T, \pi)} e_{\nu^*}(T, \hat{\Delta}) > C \sqrt{|\mathcal{U}_\mathcal{E}|}, \text{ when } T \text{ is sufficiently large.}$$

771 Here,  $C$  is a constant. According to our condition, it induces that  $\mathcal{R}_\nu(T, \pi) \succ_T C_1 T^{2\alpha_1}$ ,  
772  $e_\nu(T, \hat{\Delta}) \succ_T C_2 |\mathcal{U}_\mathcal{E}|^{1/2} T^{\alpha_2}$ , where  $C_1, C_2 \geq 0, C_1 C_2 = C, \alpha_1 + \alpha_2 > 0, \alpha_2 \leq 0, \alpha_1 \in [0, 1/2]$   
773 since the regret is bounded as  $O(T)$ . It indicates that  $\alpha_2 \geq -1/2$ . On this basis, we could  
774 construct feasible pair  $\{\pi_{\text{alg}}, \hat{\Delta}_{\text{alg}}\}$  via selecting suitable  $T_1 := T^{-2\alpha_2}$  in Algorithm 1 to satisfy  
775  $e_\nu(T, \hat{\Delta}) \simeq_T e_\nu(T, \hat{\Delta})^8$ . According to Theorem 1, it follows that the pair  $\{\pi_{\text{alg}}, \hat{\Delta}_{\text{alg}}\}$  would  
776 Pareto-dominate the original  $\{\pi, \hat{\Delta}\}$ . Contradiction.

## 777 J Algorithm UCB-Two Stage-Network

778 The UCB-TSN algorithm operates in two phases: an initial round-robin exploration phase over all  
779 exposure super arms to obtain empirical estimates of their rewards, followed by a UCB-based  
780 selection phase where, at each time step, the super arm with the highest upper confidence bound is  
781 chosen for sampling.

<sup>8</sup>Here  $\simeq$  is the combination of  $\succ$  and  $\prec$ .

---

**Algorithm 1** UCB-Two Stage-Network (UCB-TSN)

---

**Input:** arm set  $\mathcal{A}$ , time  $\{T_1, T\}$ , unit number  $N$ , exposure super arm set  $\mathcal{U}_{\mathcal{E}}$ , estimator set  $\{\hat{R}_0(S) = 0\}_{S \in \mathcal{U}_{\mathcal{E}}}$ ,  $\{\mathcal{N}_0^S = 0\}_{S \in \mathcal{U}_{\mathcal{E}}}$ ,  $\{\text{UCB}_{0,S} = 0\}_{S \in \mathcal{U}_{\mathcal{E}}}$ , counter  $k = 1$   
**for**  $t = 1 : T_1$  **do**  
    Select exposure super arm  $S_t = S_k$  and implement  $\text{Sampling}(S_t)$   
    Set  $k = k + 1$  if  $k + 1 \leq |\mathcal{U}_{\mathcal{E}}|$ , else set  $k = 1$   
**end for**  
For all  $S_i, S_j \in \mathcal{U}_{\mathcal{E}}, S_i \neq S_j$ , output  $\hat{\Delta}_T^{(i,j)} = \hat{R}_{T_1}(S_i) - \hat{R}_{T_1}(S_j)$   
**for**  $t = T_1 + 1 : T$  **do**  
    Select  $S_t = \arg \max_{S \in \mathcal{U}_{\mathcal{E}}} \text{UCB}_{t-1,S}$  and implement  $\text{Sampling}(S_t)$   
**end for**  
# Parameter 1:  $\mathcal{N}_S^t = \sum_{t'=1}^t \mathbf{1}\{S_{t'} = S\}$   
# Parameter 2:  $\hat{R}_t(S) = (\hat{R}_{t-1}(S)\mathcal{N}_S^{t-1} + \mathbf{1}\{S_t = S\} \frac{1}{N} \sum_{i \in \mathcal{U}} \tilde{r}_{i,t}(S)) / \mathcal{N}_S^t$   
# Parameter 3:  $\text{UCB}_{t,S} = \hat{R}_t(S) + \sqrt{18 \log(1/\delta) / \mathcal{N}_S^t}$

---



---

**Algorithm 2** Sampling

---

**Input:**  $S_t$   
Derive the set  $\{Z_{l'}\}_{l' \in [l]}$  such that  $\{\mathbf{S}(i, Z_{l'}, \mathbb{H})\}_{i \in \mathcal{U}} = S_t, \forall l' \in [l]$ ; sample  $A_t$  from set  $\{Z_{l'}\}_{l' \in [l]}$  based on  $\mathbb{P}(A_t = A \mid S_t)$ , pull  $A_t$ , and observe reward  $\{\tilde{r}_{i,t}(S_t) = r_{i,t}(A_t)\}_{i \in \mathcal{U}}$

---

## K Proof of Theorems in Section 5

### K.1 Proof of Theorem 3

**Proof 4 (Proof of Theorem 3)** Based on the design of the Algorithm 1, in the first phase, we have  $\mathcal{N}_S^{T_1} \geq \lfloor \frac{T_1}{|\mathcal{U}_{\mathcal{E}}|} \rfloor \geq 1$  for all  $S \in \mathcal{U}_{\mathcal{E}}$ . Define the good event as  $\mathcal{E}_{T_1} := \left\{ \hat{R}_{T_1}(S) - \frac{1}{N} \sum_{i \in \mathcal{U}} \tilde{Y}_i(S) \leq \sqrt{4 \log(T_1 |\mathcal{U}_{\mathcal{E}}|) / \mathcal{N}_S^{T_1}}, \forall S \in \mathcal{U}_{\mathcal{E}} \right\}$  and its complement as  $\mathcal{E}_{T_1}^c$ . Based on the previous discussion, the sub-Gaussian proxy of any exposure super arm's reward distribution is at most 2, then based on the Hoeffding inequality (Lemma 4), we have for a exposure super arm  $S \in \mathcal{U}_{\mathcal{E}}$ :

$$\mathbb{P} \left( \hat{R}_t(S) - \frac{1}{N} \sum_{i \in \mathcal{U}} \tilde{Y}_i(S) > a \right) \leq e^{-\frac{\mathcal{N}_S^t a^2}{4}}, \quad (31)$$

substituting  $t = T_1$  and  $a = \sqrt{\frac{4 \log(T_1 |\mathcal{U}_{\mathcal{E}}|)}{\mathcal{N}_S^{T_1}}}$  into Eq (31) and we can derive

$$\mathbb{P} \left( \hat{R}_{T_1}(S) - \frac{1}{N} \sum_{i \in \mathcal{U}} \tilde{Y}_i(S) > \sqrt{\frac{4 \log(T_1 |\mathcal{U}_{\mathcal{E}}|)}{\mathcal{N}_S^{T_1}}} \right) \leq \frac{1}{T_1 |\mathcal{U}_{\mathcal{E}}|}. \quad (32)$$

Utilize the union bound, there is

$$\begin{aligned} \mathbb{P}(\mathcal{E}_{T_1}^c) &\leq \sum_{S \in \mathcal{U}_{\mathcal{E}}} \mathbb{P} \left( \left\{ \hat{R}_{T_1}(S) - \frac{1}{N} \sum_{i \in \mathcal{U}} \tilde{Y}_i(S) > \sqrt{\frac{4 \log(T_1 |\mathcal{U}_{\mathcal{E}}|)}{\mathcal{N}_S^{T_1}}} \right\} \right) \\ &\leq \sum_{S \in \mathcal{U}_{\mathcal{E}}} \frac{1}{T_1 |\mathcal{U}_{\mathcal{E}}|} \\ &\leq \frac{1}{T_1}, \end{aligned} \quad (33)$$

791 and  $\mathbb{P}(\mathcal{E}_{T_1}) \geq 1 - \frac{1}{T_1}$ . Therefore, for all  $S_i, S_j \in \mathcal{U}_{\mathcal{E}}$ , we have:

$$\begin{aligned}
& \mathbb{E} \left[ \left| \Delta^{(i,j)} - \hat{\Delta}_T^{(i,j)} \right| \right] \\
& \leq \mathbb{P}(\mathcal{E}_{T_1}) \mathbb{E} \left[ \left| \Delta^{(i,j)} - \hat{\Delta}_T^{(i,j)} \right| \mid \mathcal{E}_{T_1} \right] + \mathbb{P}(\mathcal{E}_{T_1}^c) \mathbb{E} \left[ \left| \Delta^{(i,j)} - \hat{\Delta}_T^{(i,j)} \right| \mid \mathcal{E}_{T_1}^c \right] \\
& \leq \mathbb{P}(\mathcal{E}_{T_1}) \mathbb{E} \left[ \left| \hat{R}_t(S) - \frac{1}{N} \sum_{i' \in \mathcal{U}} \tilde{Y}_{i'}(S_i) \right| + \left| \hat{R}_t(S) - \frac{1}{N} \sum_{i' \in \mathcal{U}} \tilde{Y}_{i'}(S_j) \right| \mid \mathcal{E}_{T_1} \right] + \frac{1}{T_1} \\
& \leq 2 \sqrt{\frac{4 \log(T_1 |\mathcal{U}_{\mathcal{E}}|)}{\lfloor \frac{T_1}{|\mathcal{U}_{\mathcal{E}}|} \rfloor}} + \frac{1}{T_1} \\
& = \tilde{O} \left( \sqrt{\frac{|\mathcal{U}_{\mathcal{E}}|}{T_1}} \right),
\end{aligned} \tag{34}$$

792 where the second inequality is owing to the triangle inequality and  $\Delta^{(i,j)}$  and  $\hat{\Delta}_T^{(i,j)} \in [0, 1]$ , and the  
793 last inequality is owing to  $\mathcal{N}_S^{T_1} \geq \lfloor \frac{T_1}{|\mathcal{U}_{\mathcal{E}}|} \rfloor$ . Here we finish the proof of Theorem 3.

## 794 K.2 Proof of Theorem 4

795 In this section, we will first provide an instance-dependent regret upper bound (in the following  
796 Lemma 1), and then, we will provide an instance-independent regret upper bound based on the  
797 instance-dependent one.

798 **Lemma 1 (Instance-dependent regret)** *Given any instance that satisfies Condition 1. The regret of*  
799 *the UCB-TSN can be upper bounded as follows*

$$\mathcal{R}(T, \pi) = O \left( \sum_{S_i \neq S^*, \Delta^i > 0} \frac{\log(T)}{\Delta^i} + T_1 \right). \tag{35}$$

800 **Proof 5 (Proof of Lemma 1)** Define  $\mathcal{N}_S^{(t,T)} = \sum_{t'=t}^T \mathbf{1}\{S_{t'} = S\}$ . Besides, define the good event  
801 for  $S_i$  as:

$$\mathcal{E}_i = \left\{ \frac{1}{N} \sum_{i' \in \mathcal{U}} \tilde{Y}_{i'}(S^*) \leq \text{UCB}_{t, S^*}, \forall t \in [T_1 + 1, T] \right\} \cap \left\{ \hat{R}_{\mathcal{T}_i, S_i} + \sqrt{\frac{18 \log(\frac{1}{\delta})}{\mathcal{T}_i}} \leq \frac{1}{N} \sum_{i' \in \mathcal{U}} \tilde{Y}_{i'}(S^*) \right\},$$

802 where  $\mathcal{T}_i = \frac{72 \log(1/\delta)}{(\Delta^i)^2}$  and we utilize  $\hat{R}_{\mathcal{T}_i, S_i}$  to represent  $\hat{R}_t(S_i)$  when  $\mathcal{N}_{S_i}^t = \mathcal{T}_i$ . Based on Lemma  
803 2, we have  $\mathbb{P}(\mathcal{E}_i) \geq 1 - (T - T_1 + 1)\delta$  and its complement has  $\mathbb{P}(\mathcal{E}_i^c) \leq (T - T_1 + 1)\delta$ .

804 We can decompose and bound the regret as

$$\begin{aligned}
\mathcal{R}(T, \pi) &= \frac{T}{N} \sum_{i \in \mathcal{U}} \tilde{Y}_i(S^*) - \mathbb{E}_{\pi} \left[ \sum_{t \in [T]} \sum_{i \in \mathcal{U}} \tilde{r}_{i,t}(S_t) \right], \\
&\leq \underbrace{\sum_{S_i \neq S^*, \Delta^i > 0} \Delta^i \mathbb{E}_{\pi} \left[ \mathcal{N}_{S_i}^{(T_1+1, T)} \right]}_{\text{regret in second phase}} + \underbrace{\lceil \frac{T_1}{|\mathcal{U}_{\mathcal{E}}|} \rceil \sum_{S_i \neq S^*} \Delta^i}_{\text{regret in first phase}} \\
&= \sum_{S_i \neq S^*, \Delta^i > 0} \left( \Delta^i \mathbb{E}_{\pi} \left[ \mathcal{N}_{S_i}^{(T_1+1, T)} \mid \mathcal{E}_i \right] + \Delta^i \mathbb{E}_{\pi} \left[ \mathcal{N}_{S_i}^{(T_1+1, T)} \mid \mathcal{E}_i^c \right] \right) + \lceil \frac{T_1}{|\mathcal{U}_{\mathcal{E}}|} \rceil \sum_{S_i \neq S^*} \Delta^i \\
&\leq \sum_{S_i \neq S^*, \Delta^i > 0} \Delta^i \mathbb{E}_{\pi} \left[ \mathcal{N}_{S_i}^{(T_1+1, T)} \mid \mathcal{E}_i \right] + T^2 \delta + \lceil \frac{T_1}{|\mathcal{U}_{\mathcal{E}}|} \rceil \sum_{S_i \neq S^*} \Delta^i.
\end{aligned} \tag{36}$$



805 Besides, we want to show that under the event  $\mathcal{E}_i$ , we have  $\mathcal{N}_{S_i}^{(T_1+1, T)} \leq \mathcal{T}_i$ . If  $T_1 = T$ , then  
 806 this inequality trivially holds. If  $T_1 < T$ , suppose  $\mathcal{N}_{S_i}^{(T_1+1, T)} > \mathcal{T}_i$ , then, there exists a time  
 807  $t_i \in [T_1 + 1, T]$ , such that  $S_{t_i} = S_i$  ( $S_i$  is pulled in round  $t_i$ ), and  $\mathcal{N}_{S_i}^{(t_i, T)} = \mathcal{T}_i + 1$ . Based on the  
 808 exploration strategy in Algorithm 1, we have  $UCB_{t_i-1, S_i} \geq UCB_{t_i-1, S^*}$ . However, based on the  
 809 definition of the event  $\mathcal{E}_i$ , we have

$$\begin{aligned} UCB_{t_i-1, S^*} &\geq \frac{1}{N} \sum_{i' \in \mathcal{U}} \tilde{Y}_{i'}(S^*) \\ &> \hat{R}_{\mathcal{T}_i, S_i} + \sqrt{\frac{18 \log(1/\delta)}{\mathcal{T}_i}} \\ &= \hat{R}_{t_i-1}(S_i) + \sqrt{\frac{18 \log(1/\delta)}{\mathcal{N}_{S_i}^{t_i-1}}} \\ &= UCB_{t_i-1, S_i}, \end{aligned}$$

810 which contradicts the previous assumption. Therefore, under the event  $\mathcal{E}_i$ , we have  $\mathcal{N}_{S_i}^T \leq \mathcal{T}_i$ .  
 811 Substituting this result and  $\delta = 1/T^2$  into Eq (36), we have

$$\begin{aligned} \mathcal{R}(T, \pi) &\leq \sum_{S_i \neq S^*, \Delta^i > 0} \Delta^i \mathbb{E}_\pi \left[ \mathcal{N}_{S_i}^{(T_1+1, T)} \mid \mathcal{E}_i \right] + T^2 \delta + \lceil \frac{T_1}{\mathcal{U}_\mathcal{E}} \rceil \sum_{S_i \neq S^*} \Delta^i \\ &\leq \sum_{S_i \neq S^*, \Delta^i > 0} \Delta^i \mathcal{T}_i + 1 + \lceil \frac{T_1}{\mathcal{U}_\mathcal{E}} \rceil \sum_{S_i \neq S^*} \Delta^i \\ &\leq \sum_{S_i \neq S^*, \Delta^i > 0} \frac{144 \log(T)}{\Delta^i} + 1 + \lceil \frac{T_1}{\mathcal{U}_\mathcal{E}} \rceil \sum_{S_i \neq S^*} \Delta^i \\ &= O \left( \sum_{S_i \neq S^*, \Delta^i > 0} \frac{\log(T)}{\Delta^i} + \lceil \frac{T_1}{\mathcal{U}_\mathcal{E}} \rceil \sum_{S_i \neq S^*} \Delta^i \right). \end{aligned} \tag{37}$$

812 Here we finish the proof of Lemma 1.

813 The proof of Lemma 1 relies on the following Lemma 2.

814 **Lemma 2** We have  $\mathbb{P}(\mathcal{E}_i) \geq 1 - (T - T_1 + 1)\delta$  for all  $S_i$  satisfies  $S_i \neq S^*$  and  $\Delta^i > 0$ .

815 **Proof 6 (Proof of Lemma 2)** Define the complement of  $\mathcal{E}_i$  as

$$\mathcal{E}_i^c = \left\{ \frac{1}{N} \sum_{i' \in \mathcal{U}} \tilde{Y}_{i'}(S^*) > UCB_t^*, \exists t \in [T_1 + 1, T] \right\} \cup \left\{ \hat{R}_{\mathcal{T}_i, S_i} + \sqrt{\frac{18 \log(\frac{1}{\delta})}{\mathcal{T}_i}} > \frac{1}{N} \sum_{i' \in \mathcal{U}} \tilde{Y}_{i'}(S^*) \right\}.$$

816 Based on the union bound, we have

$$\begin{aligned} \mathbb{P}(\mathcal{E}_i^c) &\leq \mathbb{P} \left( \left\{ \frac{1}{N} \sum_{i' \in \mathcal{U}} \tilde{Y}_{i'}(S^*) \geq UCB_{t, S^*}, \exists t \in [T_1 + 1, T] \right\} \right. \\ &\quad \left. + \mathbb{P} \left( \left\{ \hat{R}_{\mathcal{T}_i, S_i} + \sqrt{\frac{18 \log(\frac{1}{\delta})}{\mathcal{T}_i}} \geq \frac{1}{N} \sum_{i' \in \mathcal{U}} \tilde{Y}_{i'}(S^*) \right\} \right) \right) \\ &\leq \sum_{t=T_1+1}^T \mathbb{P} \left( \left\{ \frac{1}{N} \sum_{i' \in \mathcal{U}} \tilde{Y}_{i'}(S^*) \geq UCB_{t, S^*} \right\} \right. \\ &\quad \left. + \mathbb{P} \left( \left\{ \hat{R}_{\mathcal{T}_i, S_i} + \sqrt{\frac{18 \log(\frac{1}{\delta})}{\mathcal{T}_i}} \geq \frac{1}{N} \sum_{i' \in \mathcal{U}} \tilde{Y}_{i'}(S^*) \right\} \right) \right). \end{aligned} \tag{38}$$

817 Based on Hoeffding's inequality, we can bound the first term in Eq (38) by:

$$\sum_{t=T_1+1}^T \mathbb{P} \left( \left\{ \frac{1}{N} \sum_{i' \in \mathcal{U}} \tilde{Y}_{i'}(S^*) \geq \text{UCB}_{t,S^*} \right\} \right) \leq (T - T_1)\delta. \quad (39)$$

818 Besides, we can bound the second term in Eq (38) by:

$$\begin{aligned} & \mathbb{P} \left( \left\{ \hat{R}_{\mathcal{T}_i, S_i} + \sqrt{\frac{18 \log(\frac{1}{\delta})}{\mathcal{T}_i}} \geq \frac{1}{N} \sum_{i' \in \mathcal{U}} \tilde{Y}_{i'}(S^*) \right\} \right) \\ &= \mathbb{P} \left( \left\{ \hat{R}_{\mathcal{T}_i, S_i} - \frac{1}{N} \sum_{i' \in \mathcal{U}} \tilde{Y}_{i'}(S_i) \geq \Delta^i - \sqrt{\frac{18 \log(\frac{1}{\delta})}{\mathcal{T}_i}} \right\} \right) \\ &\leq \mathbb{P} \left( \left\{ \hat{R}_{\mathcal{T}_i, S_i} - \frac{1}{N} \sum_{i' \in \mathcal{U}} \tilde{Y}_{i'}(S_i) \geq \frac{1}{2} \Delta^i \right\} \right) \\ &\leq \exp \left( -\frac{\mathcal{T}_i (\Delta^i)^2}{16} \right) \\ &\leq \delta, \end{aligned} \quad (40)$$

819 where the first and last inequality is owing to the definition of  $\mathcal{T}_i$ , and the second inequality is owing  
820 to Hoeffding's inequality. Based on Eq (39) and Eq (40), we have  $\mathbb{P}(\mathcal{E}_i) \geq 1 - (T - T_1 + 1)\delta$  for all  
821  $S_i$  satisfies  $S_i \neq S^*$  and  $\Delta^i > 0$ . Here we finish the proof of Lemma 2.

822 Now we can prove Theorem 4.

823 **Proof 7 (Proof of Theorem 4)** In the Proof of Lemma 1, we shows that for all  $S_i \neq S^*$ ,  $\Delta^i > 0$ ,  
824 we have

$$\mathbb{E}_\pi \left[ \mathcal{N}_{S_i}^{(T_1+1, T)} \right] \leq \frac{144 \log(T)}{(\Delta^i)^2} + 1. \quad (41)$$

825 Define  $\Lambda = 6\sqrt{\frac{|\mathcal{U}_\mathcal{E}| \log(T)}{T}}$ , we can decompose the regret as

$$\begin{aligned} \mathcal{R}(T, \pi) &\leq \sum_{S_i \neq S^*, \Delta^i < \Lambda} \Delta^i \mathbb{E}_\pi \left[ \mathcal{N}_{S_i}^{(T_1+1, T)} \right] + \sum_{S_i \neq S^*, \Delta^i \geq \Lambda} \Delta^i \mathbb{E}_\pi \left[ \mathcal{N}_{S_i}^{(T_1+1, T)} \right] + \lceil \frac{T_1}{|\mathcal{U}_\mathcal{E}|} \rceil \sum_{S_i \neq S^*} \Delta^i \\ &\leq T\Lambda + \sum_{S_i \neq S^*, \Delta^i \geq \Lambda} \left( \frac{144 \log(T)}{\Delta^i} + \Delta^i \right) + \lceil \frac{T_1}{|\mathcal{U}_\mathcal{E}|} \rceil \sum_{S_i \neq S^*} \Delta^i, \\ &\leq T\Lambda + \frac{144|\mathcal{U}_\mathcal{E}| \log(T)}{\Lambda} + \left( 1 + \lceil \frac{T_1}{|\mathcal{U}_\mathcal{E}|} \rceil \right) \sum_{S_i \neq S^*} \Delta^i \\ &\leq 30\sqrt{|\mathcal{U}_\mathcal{E}| T \log(T)} + \left( 1 + \lceil \frac{T_1}{|\mathcal{U}_\mathcal{E}|} \rceil \right) \sum_{S_i \neq S^*} \Delta^i \\ &= \tilde{O} \left( \sqrt{|\mathcal{U}_\mathcal{E}| T} + \frac{T_1}{|\mathcal{U}_\mathcal{E}|} \sum_{S_i \neq S^*} \Delta^i \right). \end{aligned} \quad (42)$$

826 Here we finish the proof of Theorem 4.

## 827 L Algorithm for Adversarial Setting in Simchi-Levi and Wang [2024]

828 This section introduces our algorithm, EXP3-TSN, which operates in two distinct phases. In the first  
829 phase, the algorithm uniformly samples exposure super arms from the set  $\mathcal{U}_\mathcal{E}$ . Upon receiving reward  
830 feedback, it leverages this data to build unbiased inverse probability weighting (IPW) estimators to  
831 estimate the potential outcomes for the super arms. In the second phase, the algorithm applies the  
832 EXP3 strategy to minimize regret effectively.

---

**Algorithm 3** EXP3-Two Stage Network (EXP3-TSN)

---

**Input:** arm set  $\mathcal{A}$ , unit number  $N$ , exposure super arm set  $\mathcal{U}_{\mathcal{E}}$ , estimator set  $\{\hat{R}_0(S) = 0\}_{S \in \mathcal{U}_{\mathcal{E}}}$ , active super exposure arm set  $\mathcal{A}_0 = \mathcal{U}_{\mathcal{E}}$ ,  $T_1$ ,  $\alpha = (e - 2)(1 + 2|\mathcal{U}_{\mathcal{E}}|)e^2 \log(2/\delta)$ ,  $\epsilon = \sqrt{\frac{\log(|\mathcal{U}_{\mathcal{E}}|)}{|\mathcal{U}_{\mathcal{E}}|T}}$

**for**  $t = 1 : T_1$  **do**  
 $\forall S \in \mathcal{U}_{\mathcal{E}} : \pi_t(S) = \frac{1}{|\mathcal{U}_{\mathcal{E}}|}$  and sample  $S_t$  based on  $\pi_t$   
Sample  $S_t$  based on  $\pi_t$ , implement **Sampling**( $S_t$ )  
**end for**  
Output  $\hat{\Delta}^{(i,j)} = \frac{1}{T_1} \hat{R}_{T_1}(S_i) - \frac{1}{T_1} \hat{R}_{T_1}(S_j)$  for any  $S_i, S_j \in \mathcal{U}_{\mathcal{E}}, S_i \neq S_j$   
 $\forall S \in \mathcal{U}_{\mathcal{E}} : \text{set } \hat{R}_{T_1}(S) = 0$   
**for**  $t = T_1 + 1 : T$  **do**  
 $\forall S \in \mathcal{U}_{\mathcal{E}} : \pi_t(S) = \frac{\exp(\epsilon \hat{R}_{t-1}(S))}{\sum_{S \in \mathcal{S}_t} \exp(\epsilon \hat{R}_{t-1}(S))}$   
Sample  $S_t$  based on  $\pi_t$ , implement **Sampling**( $S_t$ )  
 $\forall S \in \mathcal{U}_{\mathcal{E}} : \text{set } \hat{R}_t(S) = \hat{R}_{t-1}(S) + 1 - \frac{\mathbf{1}\{S_t=S\}(1 - \frac{1}{N} \sum_{i \in \mathcal{U}} \tilde{r}_{i,t}(S))}{\pi_t(S)}$   
**end for**

---

833 **Unbiased estimators for exposure mapping** We construct unbiased inverse probability weighting  
834 (IPW) estimators to estimate the potential outcome of each exposure super arm, i.e.,

$$\hat{R}_t(S) = \hat{R}_{t-1}(S) + 1 - \frac{\mathbf{1}\{S_t = S\}(1 - \frac{1}{N} \sum_{i \in \mathcal{U}} \tilde{r}_{i,t}(S))}{\pi_t(S)}. \quad (43)$$

835 It is easy to verify that for all  $S \in \mathcal{U}_{\mathcal{E}}$ , for all  $t \in [1, T]$ :

$$\mathbb{E} \left[ 1 - \frac{\mathbf{1}\{S_t = S\}(1 - \frac{1}{N} \sum_{i \in \mathcal{U}} \tilde{r}_{i,t}(S))}{\pi_t(S)} \mid \mathcal{H}_{t-1} \right] = \frac{1}{N} \sum_{i \in \mathcal{U}} \tilde{Y}_i(S) + f_t. \quad (44)$$

836 Using our unbiased estimator  $\hat{R}_t(S)$ , we can accurately estimate the ATE (which is demonstrated in  
837 Theorem 6). We define the martingale sequence as  $(\{M_{t'}^{(i,j)}\}_{S_i \neq S_j})_{t'=1}^t$ , where  $M_t^{(i,j)} = \hat{R}_t(S_i) -$   
838  $\hat{R}_t(S_j) - \Delta^{(i,j)}$ , and it is easy to verify that  $\mathbb{E}[M_t^{(i,j)} \mid \mathcal{H}_{t-1}] = 0$ .

## 839 M Proof of Theorem 5

840 Theorem 5 could be equivalently separated as the following Theorem 6 and Theorem 7.

### 841 M.1 Proof of Theorem 6

842 **Theorem 6 (Bounding the ATE estimation)** Given any instance that satisfy  $T \geq \mathcal{T}(T)$  and  $|\mathcal{U}_{\mathcal{E}}| \geq$   
843  $2$ . Set  $T \geq T_1 \geq \mathcal{T}(T_1)$ . For any  $S_i \neq S_j$ , the ATE estimation error of the EXP3-TS can be upper  
844 bounded as follows:  $\mathbb{E} [|\hat{\Delta}_T^{(i,j)} - \Delta^{(i,j)}|] = \tilde{O} \left( \sqrt{\frac{|\mathcal{U}_{\mathcal{E}}|}{T_1}} \right)$ .

845 **Proof 8 (Proof of Theorem 6)** The proof of this lemma is based on the Bernstein Inequality. To  
846 utilize it, we first need to upper bound  $|M_t^{(i,j)} - M_{t-1}^{(i,j)}|$ ,  $\forall t \in [T_1]$ . It can be expressed as:

$$\begin{aligned} & |M_t^{(i,j)} - M_{t-1}^{(i,j)}| \\ &= \left| \frac{\mathbf{1}\{S_t = S_i\}(1 - \frac{1}{N} \sum_{i' \in \mathcal{U}} \tilde{r}_{i',t}(S_i))}{\pi_t(S_i)} - \frac{\mathbf{1}\{S_t = S_j\}(1 - \frac{1}{N} \sum_{i' \in \mathcal{U}} \tilde{r}_{i',t}(S_j))}{\pi_t(S_j)} - \Delta^{(j,i)} \right| \\ &\leq \frac{1}{\pi_t(S_i)} + \frac{1}{\pi_t(S_j)} + 1 \\ &= 2|\mathcal{U}_{\mathcal{E}}| + 1, \end{aligned}$$

where the first inequality is owing to the  $\tilde{r}_{i,t}(\cdot) \in [0, 1]$  and  $\Delta^{(j,i)} \in [-1, 1]$ , and the second equality is due to the definition of  $\pi_t(S)$  in the first phase. We also need to upper bound the variance of the martingale in the first phase, denoted as  $V_t^{(i,j)}$ , i.e.,

$$\begin{aligned} & V_t^{(i,j)} \\ &= \sum_{t \in [T_1]} \mathbb{E} \left[ \left( \frac{\mathbf{1}\{S_t = S_i\} \left(1 - \frac{1}{N} \sum_{i' \in \mathcal{U}} \tilde{r}_{i',t}(S_i)\right)}{\pi_t(S_i)} - \frac{\mathbf{1}\{S_t = S_j\} \left(1 - \frac{1}{N} \sum_{i' \in \mathcal{U}} \tilde{r}_{i',t}(S_j)\right)}{\pi_t(S_j)} - \Delta^{(i,j)} \right)^2 \mid \mathcal{H}_{t-1} \right] \\ &\leq \sum_{t \in [T_1]} \left( \frac{1}{\pi_t(S_i)} + \frac{1}{\pi_t(S_j)} \right) \\ &\leq 2T_1 |\mathcal{U}_{\mathcal{E}}|. \end{aligned}$$

Based on this fact that  $T_1 \geq \frac{(2|\mathcal{U}_{\mathcal{E}}|+1)^2 \log(2T_1 |\mathcal{U}_{\mathcal{E}}|^2)}{2(e-2)|\mathcal{U}_{\mathcal{E}}|}$ , we have

$$\sqrt{\frac{\log(2T_1 |\mathcal{U}_{\mathcal{E}}|^2)}{2(e-2)|\mathcal{U}_{\mathcal{E}}|T_1}} \leq \frac{1}{2|\mathcal{U}_{\mathcal{E}}|+1},$$

which implies we can utilize the Bernstein Inequality (Lemma 5). By the Bernstein inequality, we have:  $\forall t \in [T_1]$ , with probability at least  $1 - \frac{1}{T_1 |\mathcal{U}_{\mathcal{E}}|^2}$ , there is

$$|M_t^{(i,j)}| \leq 2\sqrt{2(e-2)|\mathcal{U}_{\mathcal{E}}|T_1 \log(2T_1 |\mathcal{U}_{\mathcal{E}}|^2)}.$$

Dividing both sides by  $T_1$ , based on the definition of the martingale  $M_t^{(i,j)}$  and the ATE estimator  $\hat{\Delta}^{(i,j)}$ , we have:

$$|\Delta^{(i,j)} - \hat{\Delta}_T^{(i,j)}| \leq 2\sqrt{\frac{4(e-2)|\mathcal{U}_{\mathcal{E}}| \log(2T_1 |\mathcal{U}_{\mathcal{E}}|)}{T_1}}. \quad (45)$$

Define the good event as  $\mathcal{E}_{T_1} := \left\{ |\Delta^{(i,j)} - \hat{\Delta}_T^{(i,j)}| \leq 2\sqrt{\frac{4(e-2)|\mathcal{U}_{\mathcal{E}}| \log(2T_1 |\mathcal{U}_{\mathcal{E}}|)}{T_1}}, \forall S_i \neq S_j \right\}$ . By applying the union bound, it is easy to know that

$$\mathbb{P}(\mathcal{E}_{T_1}) \geq 1 - \frac{1}{T_1}. \quad (46)$$

Based on the above result, for any  $S_i \neq S_j$ , we have

$$\begin{aligned} & \mathbb{E} \left[ |\hat{\Delta}_T^{(i,j)} - \Delta^{(i,j)}| \right] \leq \mathbb{P}(\mathcal{E}_{T_1}) \mathbb{E} \left[ |\Delta^{(i,j)} - \hat{\Delta}_T^{(i,j)}| \mid \mathcal{E}_{T_1} \right] + \mathbb{P}(\mathcal{E}_{T_1}^c) \mathbb{E} \left[ |\Delta^{(i,j)} - \hat{\Delta}_T^{(i,j)}| \mid \mathcal{E}_{T_1}^c \right] \\ & \leq 2\sqrt{\frac{4(e-2)|\mathcal{U}_{\mathcal{E}}| \log(2T_1 |\mathcal{U}_{\mathcal{E}}|)}{T_1}} + \frac{1}{T_1} \\ & = \tilde{O} \left( \sqrt{\frac{|\mathcal{U}_{\mathcal{E}}|}{T_1}} \right). \end{aligned} \quad (47)$$

Here we finish the proof of Theorem 6.

**Theorem 7 (Regret upper bound)** Given any instance that satisfy  $T \geq \mathcal{T}(T)$  and  $|\mathcal{U}_{\mathcal{E}}| \geq 2$ . The regret of EXP3-TS can be upper bounded by  $\mathcal{R}(T, \pi) = \tilde{O}(\sqrt{|\mathcal{U}_{\mathcal{E}}|T} + T_1)$ .

## M.2 Proof of Theorem 7

**Proof 9 (Proof of Theorem 7)** Define  $R(t, j) = \frac{1}{N} \sum_{i' \in \mathcal{U}} \left( \tilde{Y}_{i'}(S_j) \right) + f_t$  as the potential outcome of exposure super arm  $S_j \in \mathcal{U}_{\mathcal{E}}$  in round  $t$ . For all  $S_i \in \mathcal{U}_{\mathcal{E}}$ , we define

$$\mathcal{R}(T, \pi, i) = \sum_{t \in [T]} R(t, i) - \mathbb{E}_{\pi} \left[ \frac{1}{N} \sum_{t \in [T]} \sum_{i' \in \mathcal{U}} \tilde{r}_{i',t}(S_t) \right] \quad (48)$$

864 as the expected "regret" if the exposure super arm  $S_i$  is the best arm. If we can upper bound  $\mathcal{R}(T, \pi, i)$   
 865 for all  $S_i \in \mathcal{U}_{\mathcal{E}}$ , then we can upper bound  $\mathcal{R}(T, \pi)$ . Based on the unbiased property of the IPW  
 866 estimator, for all  $t \in \{T_1 + 1, \dots, T\}$ , we have

$$\begin{aligned}\mathbb{E}_{\pi}[\hat{R}_T(S'_i)] &= \sum_{t=T_1+1}^T R(t, i') \quad \text{and} \\ \mathbb{E}_{\pi}\left[\frac{1}{N} \sum_{t \in [T]} \sum_{i' \in \mathcal{U}} \tilde{r}_{i',t}(S_t) \mid \mathcal{H}_{t-1}\right] &= \sum_{t \in [T]} \sum_{S_{i'} \in \mathcal{U}_{\mathcal{E}}} \pi_t(S_{i'}) R(t, i') = \sum_{t \in [T]} \sum_{S_{i'} \in \mathcal{U}_{\mathcal{E}}} \pi_t(S_{i'}) \mathbb{E}_{\pi}[\hat{R}_t(S_{i'}) - \hat{R}_{t-1}(S_{i'}) \mid \mathcal{H}_{t-1}].\end{aligned}\tag{49}$$

867 Based on Eq (49), Eq (48) can be rewritten as

$$\begin{aligned}\mathcal{R}(T, \pi, i) &\leq \mathbb{E}_{\pi}[\hat{R}_T(S_i)] - \mathbb{E}_{\pi}\left[\frac{1}{N} \sum_{t=T_1+1}^T \sum_{i' \in \mathcal{U}} \tilde{r}_{i',t}(S_t)\right] + T_1 \\ &= \mathbb{E}_{\pi}[\hat{R}_T(S_i)] - \mathbb{E}_{\pi}\left[\mathbb{E}_{\pi}\left[\frac{1}{N} \sum_{t=T_1+1}^T \sum_{i' \in \mathcal{U}} \tilde{r}_{i',t}(S_t) \mid \mathcal{H}_{t-1}\right]\right] + T_1 \\ &= \mathbb{E}_{\pi}[\hat{R}_T(S_i)] - \mathbb{E}_{\pi}\left[\sum_{t=T_1+1}^T \sum_{S_{i'} \in \mathcal{U}_{\mathcal{E}}} \pi_t(S_{i'}) \mathbb{E}_{\pi}[\hat{R}_t(S_{i'}) - \hat{R}_{t-1}(S_{i'}) \mid \mathcal{H}_{t-1}]\right] + T_1 \\ &= \mathbb{E}_{\pi}\left[\hat{R}_T(S_i) - \sum_{t=T_1+1}^T \sum_{S_{i'} \in \mathcal{U}_{\mathcal{E}}} \pi_t(S_{i'}) (\hat{R}_t(S_{i'}) - \hat{R}_{t-1}(S_{i'}))\right] + T_1 \\ &= \mathbb{E}_{\pi}[\hat{R}_T(S_i) - \hat{R}_T] + T_1,\end{aligned}\tag{50}$$

868 where the first and third equality is owing to the tower rule, and the last equality is owing to we define  
 869  $\hat{R}_T = \sum_{t=T_1+1}^T \sum_{S_{i'} \in \mathcal{U}_{\mathcal{E}}} \pi_t(S_{i'}) (\hat{R}_t(S_{i'}) - \hat{R}_{t-1}(S_{i'}))$ .

870 Define  $W_T = \sum_{S_{i'} \in \mathcal{U}_\mathcal{E}} \exp(\epsilon \hat{R}_T(S_{i'}))$ , we have

$$\begin{aligned}
W_T &= W_{T_1} \frac{W_{T_1+1}}{W_{T_1}} \cdots \frac{W_T}{W_{T-1}} \\
&= |\mathcal{U}_\mathcal{E}| \prod_{t=T_1+1}^T \frac{W_t}{W_{t-1}} \\
&= |\mathcal{U}_\mathcal{E}| \prod_{t=T_1+1}^T \left( \sum_{S_{i'} \in \mathcal{U}_\mathcal{E}} \frac{\exp(\epsilon \hat{R}_{t-1}(S_{i'}))}{W_{t-1}} \exp\left(\epsilon \left(\hat{R}_t(S_{i'}) - \hat{R}_{t-1}(S_{i'})\right)\right) \right) \\
&= |\mathcal{U}_\mathcal{E}| \prod_{t=T_1+1}^T \left( \sum_{S_{i'} \in \mathcal{U}_\mathcal{E}} \pi_t(S_{i'}) \exp\left(\epsilon \left(\hat{R}_t(S_{i'}) - \hat{R}_{t-1}(S_{i'})\right)\right) \right) \\
&\leq |\mathcal{U}_\mathcal{E}| \prod_{t=T_1+1}^T \left( 1 + \epsilon \sum_{S_{i'} \in \mathcal{U}_\mathcal{E}} \pi_t(S_{i'}) \left( \hat{R}_t(S_{i'}) - \hat{R}_{t-1}(S_{i'}) \right) \right. \\
&\quad \left. + \epsilon^2 \sum_{S_{i'} \in \mathcal{U}_\mathcal{E}} \pi_t(S_{i'}) \left( \hat{R}_t(S_{i'}) - \hat{R}_{t-1}(S_{i'}) \right)^2 \right) \\
&\leq |\mathcal{U}_\mathcal{E}| \prod_{t=T_1+1}^T \exp\left( \epsilon \sum_{S_{i'} \in \mathcal{U}_\mathcal{E}} \pi_t(S_{i'}) \left( \hat{R}_t(S_{i'}) - \hat{R}_{t-1}(S_{i'}) \right) \right. \\
&\quad \left. + \epsilon^2 \sum_{S_{i'} \in \mathcal{U}_\mathcal{E}} \pi_t(S_{i'}) \left( \hat{R}_t(S_{i'}) - \hat{R}_{t-1}(S_{i'}) \right)^2 \right) \\
&= |\mathcal{U}_\mathcal{E}| \exp\left( \epsilon \hat{R}_T + \epsilon^2 \sum_{t'=T_1+1}^T \sum_{S_{i'} \in \mathcal{U}_\mathcal{E}} \pi_{t'}(S_{i'}) \left( \hat{R}_{t'}(S_{i'}) - \hat{R}_{t'-1}(S_{i'}) \right)^2 \right),
\end{aligned} \tag{51}$$

871 where the fourth equality is owing to the definition of  $\pi_t(S)$ , the first inequality is owing to  $\exp(x) \leq$   
872  $1 + x + x^2$  for all  $x \leq 1$  and  $\hat{R}_t(S) - \hat{R}_{t-1}(S) \leq 1$  for all exposure super arm  $S$ , the last inequality  
873 is owing to  $1 + x \leq \exp(x)$  for all  $x$ , and the last equality is owing to the definition of  $\hat{R}_T$ . Based on  
874 the last term of Eq (51), we can derive

$$\hat{R}_T(S_i) - \hat{R}_T \leq \frac{\log(|\mathcal{U}_\mathcal{E}|)}{\epsilon} + \epsilon \sum_{t=T_1+1}^T \sum_{S_{i'} \in \mathcal{U}_\mathcal{E}} \pi_t(S_{i'}) \left( \hat{R}_t(S_{i'}) - \hat{R}_{t-1}(S_{i'}) \right)^2, \tag{52}$$

875 and  $\mathcal{R}(T, \pi, i)$  can be bounded by

$$\begin{aligned}
\mathcal{R}(T, \pi, i) &\leq \mathbb{E}_\pi \left[ \hat{R}_T(S_i) - \hat{R}_T \right] + T_1 \\
&\leq \frac{\log(|\mathcal{U}_\mathcal{E}|)}{\epsilon} + \mathbb{E}_\pi \left[ \epsilon \sum_{t=T_1+1}^T \sum_{S_{i'} \in \mathcal{U}_\mathcal{E}} \pi_t(S_{i'}) \left( \hat{R}_t(S_{i'}) - \hat{R}_{t-1}(S_{i'}) \right)^2 \right] + T_1.
\end{aligned} \tag{53}$$

876 We then try to bound  $\mathbb{E}_\pi \left[ \epsilon \sum_{t=T_1+1}^T \sum_{S_{i'} \in \mathcal{U}_\mathcal{E}} \pi_t(S_{i'}) \left( \hat{R}_t(S_{i'}) - \hat{R}_{t-1}(S_{i'}) \right)^2 \right]$ , define  $\tilde{R}(t, j) =$   
877  $1 - \frac{1}{N} \sum_{i' \in \mathcal{U}} \tilde{r}_{i',t}(S_j)$ , there is

$$\begin{aligned}
& \mathbb{E}_\pi \left[ \epsilon \sum_{t=T_1+1}^T \sum_{S_{i'} \in \mathcal{U}_\mathcal{E}} \pi_t(S_{i'}) \left( \hat{R}_t(S_{i'}) - \hat{R}_{t-1}(S_{i'}) \right)^2 \right] \\
&= \mathbb{E}_\pi \left[ \epsilon \sum_{t=T_1+1}^T \sum_{S_{i'} \in \mathcal{U}_\mathcal{E}} \pi_t(S_{i'}) \left( 1 - \frac{\mathbf{1}\{S_t = S_{i'}\} \tilde{R}(t, i')}{\pi_t(S_{i'})} \right)^2 \right] \\
&= \mathbb{E}_\pi \left[ \epsilon \sum_{t=T_1+1}^T \sum_{S_{i'} \in \mathcal{U}_\mathcal{E}} \pi_t(S_{i'}) \left( 1 - \frac{2 \times \mathbf{1}\{S_t = S_{i'}\} \tilde{R}(t, i')}{\pi_t(S_{i'})} + \frac{\mathbf{1}\{S_t = S_{i'}\} (\tilde{R}(t, i'))^2}{\pi_t(S_{i'})^2} \right) \right] \\
&= \mathbb{E}_\pi \left[ \epsilon \sum_{t=T_1+1}^T \left( \frac{2}{N} \sum_{i' \in \mathcal{U}} \tilde{r}_{i',t}(S_t) - 1 \right) + \mathbb{E}_\pi \left[ \epsilon \sum_{t=T_1+1}^T \sum_{S_{i'} \in \mathcal{U}_\mathcal{E}} \pi_t(S_{i'}) \left( \frac{\mathbf{1}\{S_t = S_{i'}\} (\tilde{R}_{t,i'})^2}{\pi_t(S_{i'})^2} \right) \mid \mathcal{H}_{t-1} \right] \right] \\
&= \mathbb{E}_\pi \left[ \epsilon \sum_{t=T_1+1}^T \left( \frac{2}{N} \sum_{i' \in \mathcal{U}} \tilde{r}_{i',t}(S_t) - 1 \right) + \epsilon \sum_{t=T_1+1}^T \sum_{S_{i'} \in \mathcal{U}_\mathcal{E}} (\tilde{R}_{t,i'})^2 \right] \\
&\leq |\mathcal{U}_\mathcal{E}| T \epsilon.
\end{aligned}$$

878 Based on the definition of  $\epsilon$ , we can finally bound  $\mathcal{R}(T, \pi, i)$  by  $\sqrt{|\mathcal{U}_\mathcal{E}| T \log(|\mathcal{U}_\mathcal{E}|)} + T_1$ . Here we  
879 finish the proof of Theorem 7.

## 880 N Optimization perspective

881 We provide more justification upon Condition 1. Notice that we search the best arm within  $\mathcal{U}_\mathcal{E} =$   
882  $\mathcal{U}_\mathcal{C} \cap \mathcal{U}_\mathcal{O}$ , then a natural question arises that how to search elements of the intersection of these two  
883 sets? What if it is an empty set? The optimization problem is formalized as follows:

$$\begin{aligned}
& \sum_{i=1}^C c_i \mathbf{e}_i \\
& \text{s.t. } \forall i \in \mathcal{U}, c_i \in \mathcal{U}_s, \\
& \exists A \in K^\mathcal{U}, d_M \left( (\mathbf{S}(i, A, \mathbb{H}))_{i \in \mathcal{U}}, \sum_{i=1}^C c_i \mathbf{e}_i \right) = 0.
\end{aligned} \tag{54}$$

884 Here  $\mathbf{e}_i$  is a binary indicator  $(\mathbf{e}_i)_j = \begin{cases} 1, & \text{if } j \in \mathcal{C}_i \\ 0, & \text{if } j \notin \mathcal{C}_i \end{cases}$ . Moreover,  $d_M$  denotes the Manhattan Distance.

885 **Searching efficiency** It would be an NP-hard problem with a high computation load without  
886 additional assumptions. However, we argue that when we select many common exposure mapping  
887 structures, the optimization problem may degenerate into a simpler case, such as an integer pro-  
888 gramming problem. Consider the mapping  $\mathbf{S}(i, A, \mathbb{H}) := \mathbf{S}(i, A, \mathbb{H}) := \mathbf{1}\{\sum_{j \in \mathcal{U}} h_{ij} a_j > 0\}$ . Then  
889 Eq (54) could be transformed to

$$\begin{aligned}
& \sum_{i=1}^C \mathbf{1}\left\{ \sum_{j \in \mathcal{U}} h_{ij} a_j > 0 \right\} \mathbf{e}_i \\
& \text{s.t. } \exists A \in K^\mathcal{U}, \forall p, q \text{ satisfying } \mathcal{C}^{-1}(p) = \mathcal{C}^{-1}(q), \\
& \mathbf{1}\left( \sum_{j \in \mathcal{U}} h_{pj} a_j > 0 \right) = \mathbf{1}\left( \sum_{j \in \mathcal{U}} h_{qj} a_j > 0 \right).
\end{aligned} \tag{55}$$

890 To solve it, we recommend practitioners adopt the off-the-shelf optimization techniques in Mixed-  
891 Integer Nonlinear Programming Belotti et al. [2013].

892 **Practical issue** Another question arises: what if Condition 1 fails, even if it is easy to satisfy via  
 893 adjusting legitimate exposure mapping function and clustering strategy? We formalize it as a relaxed  
 894 optimization problem and claim its impact on previous modeling is negligible under mild assumptions  
 895 upon interference effect:

$$\forall \{c_i\}_{i \in [C]}, \min_{A \in \mathcal{K}^{\mathcal{U}}} d_M \left( (\mathbf{S}(i, A, \mathbb{H}))_{i \in \mathcal{U}}, \sum_{i=1}^C c_i \mathbf{e}_i \right). \quad (56)$$

896 Apparently, when Condition 1 is violated, then  $\max_{\{c_i\}_{i \in [C]}} \min_{A \in \mathcal{K}^{\mathcal{U}}} d_M \left( (\mathbf{S}(i, A, \mathbb{H}))_{i \in \mathcal{U}}, \sum_{i=1}^C c_i \mathbf{e}_i \right) >$   
 897 0. We recommend practitioners to collect the most *similar* exposure arm compared to the form  
 898  $\sum_{i=1}^C c_i \mathbf{e}_i$  as above to substitute the original intersection set  $\mathcal{U}_{\mathcal{E}}$ . Specifically,  $\forall \{c_i\}_{i \in [C]}$ , we collect  
 899  $\{\mathbf{S}(i, \mathbf{A}', \mathbb{H})\}_{i \in \mathcal{U}}$ , where  $\mathbf{A}' := \arg \min_{A \in \mathcal{K}^{\mathcal{U}}} d_M \left( (\mathbf{S}(i, A, \mathbb{H}))_{i \in \mathcal{U}}, \sum_{i=1}^C c_i \mathbf{e}_i \right)$  as a substitute of  
 900 the original corresponding cluster-wise super exposure arm. We call the substituted exposure arm set  
 901 as  $\mathcal{U}'_{\mathcal{E}}$ .

902 In this sense, we recommend practitioners to re-define the arm as (modified from (3))

$$[\tilde{Y}_i^{\text{ideal}}(S_t), \tilde{r}_{i,t}^{\text{ideal}}(S_t)]^{\top} := \sum_{A \in \arg \min_{A' \in \mathcal{K}^{\mathcal{U}}} d_M \left( (\mathbf{S}(i, A', \mathbb{H}))_{i \in \mathcal{U}}, S_t \right)} [Y_i(A), r_{i,t}(A)]^{\top} \mathbb{P}(A_t = A \mid S_t). \quad (57)$$

903 We denote the newly collected *similar* arm of the ideally best arm  $S^*$  as  $S_{\text{real}}^*$ , where the former is  
 904 constructed via cluster-wise exposure arm (might not be compatible with the original arm), and the  
 905 latter is defined as

$$S_{\text{real}}^* := \mathbf{S}(i, A_{\text{real}}^*, \mathbb{H}), \text{ where } A_{\text{real}}^* \in \arg \min_{A' \in \mathcal{K}^{\mathcal{U}}} d_M \left( (\mathbf{S}(i, A', \mathbb{H}))_{i \in \mathcal{U}}, S^* \right). \quad (58)$$

906 It could be verified that under legitimate policy  $\pi$  (such as uniform sampling), it leads to  $\tilde{Y}_i^{\text{ideal}}(S^*) =$   
 907  $\tilde{Y}_i(S_{\text{real}}^*)$ . Furthermore, the remaining part of the regret analysis could be replicated from the main  
 908 text, paying attention to the new selection set  $\mathcal{U}'_{\mathcal{E}}$ .

## 909 O Auxiliary Lemmas

910 **Lemma 3 (Sub-Gaussian)** A random variable  $X$  is said to be **sub-Gaussian** if there exists a constant  
 911  $\sigma > 0$  such that for all  $m \in \mathbb{R}$ , the moment generating function of  $X$  satisfies:

$$\mathbb{E} [e^{mX}] \leq e^{\frac{\sigma^2 m^2}{2}}.$$

912 The smallest such  $\sigma^2$  is known as the sub-Gaussian proxy of  $X$ .

913 **Lemma 4 (Hoeffding's Inequality)** Let  $X_1, X_2, \dots, X_n$  i.i.d. drawn from a  $\sigma$ -sub-Gaussian dis-  
 914 tribution,  $\bar{X} = \frac{1}{n} \sum_{i=1}^n X_i$  and  $\mathbb{E}[X]$  be the mean, then we have

$$\mathbb{P}(\bar{X} - \mathbb{E}[X] \geq a) \leq e^{-na^2/2\sigma^2} \quad \text{and} \quad \mathbb{P}(\bar{X} - \mathbb{E}[X] \leq -a) \leq e^{-na^2/2\sigma^2}.$$

915 **Lemma 5 (Bernstein's Inequality)** Let  $X_1, X_2, \dots, X_n$  be a martingale difference sequence,  
 916 where each  $X_t$  satisfies  $|X_t| \leq \alpha$  almost surely for a non-decreasing deterministic sequence  
 917  $\alpha_1, \alpha_2, \dots, \alpha_n$ . Define  $M_t := \sum_{t'=1}^t X_{t'}$  as the cumulative sum up to time  $t$ , forming  
 918 a martingale. Let  $\bar{V}_1, \bar{V}_2, \dots, \bar{V}_n$  be deterministic upper bounds on the variance  $V_t :=$   
 919  $\sum_{t'=1}^t \mathbb{E}[X_{t'}^2 | X_1, \dots, X_{t'-1}]$  of the martingale  $M_t$ , and suppose  $\bar{V}_t$  satisfies the condition

$$\sqrt{\frac{\ln(\frac{2}{\delta})}{(e-2)\bar{V}_t}} \leq \frac{1}{\alpha}.$$

920 Then, with probability at least  $1 - \delta$  for all  $t$ :

$$|M_t| \leq 2\sqrt{(e-2)\bar{V}_t \ln \frac{2}{\delta}}.$$



## NeurIPS Paper Checklist

### 1. Claims

Question: Do the main claims made in the abstract and introduction accurately reflect the paper's contributions and scope?

Answer: [\[Yes\]](#)

Justification: See our statement in the introduction and abstract.

Guidelines:

- The answer NA means that the abstract and introduction do not include the claims made in the paper.
- The abstract and/or introduction should clearly state the claims made, including the contributions made in the paper and important assumptions and limitations. A No or NA answer to this question will not be perceived well by the reviewers.
- The claims made should match theoretical and experimental results, and reflect how much the results can be expected to generalize to other settings.
- It is fine to include aspirational goals as motivation as long as it is clear that these goals are not attained by the paper.

### 2. Limitations

Question: Does the paper discuss the limitations of the work performed by the authors?

Answer: [\[Yes\]](#)

Justification: We surrogate it in the Conclusion and the Algorithm section.

Guidelines:

- The answer NA means that the paper has no limitation while the answer No means that the paper has limitations, but those are not discussed in the paper.
- The authors are encouraged to create a separate "Limitations" section in their paper.
- The paper should point out any strong assumptions and how robust the results are to violations of these assumptions (e.g., independence assumptions, noiseless settings, model well-specification, asymptotic approximations only holding locally). The authors should reflect on how these assumptions might be violated in practice and what the implications would be.
- The authors should reflect on the scope of the claims made, e.g., if the approach was only tested on a few datasets or with a few runs. In general, empirical results often depend on implicit assumptions, which should be articulated.
- The authors should reflect on the factors that influence the performance of the approach. For example, a facial recognition algorithm may perform poorly when image resolution is low or images are taken in low lighting. Or a speech-to-text system might not be used reliably to provide closed captions for online lectures because it fails to handle technical jargon.
- The authors should discuss the computational efficiency of the proposed algorithms and how they scale with dataset size.
- If applicable, the authors should discuss possible limitations of their approach to address problems of privacy and fairness.
- While the authors might fear that complete honesty about limitations might be used by reviewers as grounds for rejection, a worse outcome might be that reviewers discover limitations that aren't acknowledged in the paper. The authors should use their best judgment and recognize that individual actions in favor of transparency play an important role in developing norms that preserve the integrity of the community. Reviewers will be specifically instructed to not penalize honesty concerning limitations.

### 3. Theory assumptions and proofs

Question: For each theoretical result, does the paper provide the full set of assumptions and a complete (and correct) proof?

Answer: [\[Yes\]](#)

Justification: We provide the rigorous proof.

Guidelines:

- The answer NA means that the paper does not include theoretical results.
- All the theorems, formulas, and proofs in the paper should be numbered and cross-referenced.
- All assumptions should be clearly stated or referenced in the statement of any theorems.
- The proofs can either appear in the main paper or the supplemental material, but if they appear in the supplemental material, the authors are encouraged to provide a short proof sketch to provide intuition.
- Inversely, any informal proof provided in the core of the paper should be complemented by formal proofs provided in appendix or supplemental material.
- Theorems and Lemmas that the proof relies upon should be properly referenced.

#### 4. Experimental result reproducibility

Question: Does the paper fully disclose all the information needed to reproduce the main experimental results of the paper to the extent that it affects the main claims and/or conclusions of the paper (regardless of whether the code and data are provided or not)?

Answer: [\[Yes\]](#)

Justification: See our experiments in the Appendix; we also provide an anonymous link containing our code to ensure reproducibility.

Guidelines:

- The answer NA means that the paper does not include experiments.
- If the paper includes experiments, a No answer to this question will not be perceived well by the reviewers: Making the paper reproducible is important, regardless of whether the code and data are provided or not.
- If the contribution is a dataset and/or model, the authors should describe the steps taken to make their results reproducible or verifiable.
- Depending on the contribution, reproducibility can be accomplished in various ways. For example, if the contribution is a novel architecture, describing the architecture fully might suffice, or if the contribution is a specific model and empirical evaluation, it may be necessary to either make it possible for others to replicate the model with the same dataset, or provide access to the model. In general, releasing code and data is often one good way to accomplish this, but reproducibility can also be provided via detailed instructions for how to replicate the results, access to a hosted model (e.g., in the case of a large language model), releasing of a model checkpoint, or other means that are appropriate to the research performed.
- While NeurIPS does not require releasing code, the conference does require all submissions to provide some reasonable avenue for reproducibility, which may depend on the nature of the contribution. For example
  - (a) If the contribution is primarily a new algorithm, the paper should make it clear how to reproduce that algorithm.
  - (b) If the contribution is primarily a new model architecture, the paper should describe the architecture clearly and fully.
  - (c) If the contribution is a new model (e.g., a large language model), then there should either be a way to access this model for reproducing the results or a way to reproduce the model (e.g., with an open-source dataset or instructions for how to construct the dataset).
  - (d) We recognize that reproducibility may be tricky in some cases, in which case authors are welcome to describe the particular way they provide for reproducibility. In the case of closed-source models, it may be that access to the model is limited in some way (e.g., to registered users), but it should be possible for other researchers to have some path to reproducing or verifying the results.

#### 5. Open access to data and code

Question: Does the paper provide open access to the data and code, with sufficient instructions to faithfully reproduce the main experimental results, as described in supplemental material?

Answer: [Yes]

Justification: See our experiments in the Appendix; we also provide an anonymous link containing our code to ensure reproducibility.

Guidelines:

- The answer NA means that paper does not include experiments requiring code.
- Please see the NeurIPS code and data submission guidelines (<https://nips.cc/public/guides/CodeSubmissionPolicy>) for more details.
- While we encourage the release of code and data, we understand that this might not be possible, so “No” is an acceptable answer. Papers cannot be rejected simply for not including code, unless this is central to the contribution (e.g., for a new open-source benchmark).
- The instructions should contain the exact command and environment needed to run to reproduce the results. See the NeurIPS code and data submission guidelines (<https://nips.cc/public/guides/CodeSubmissionPolicy>) for more details.
- The authors should provide instructions on data access and preparation, including how to access the raw data, preprocessed data, intermediate data, and generated data, etc.
- The authors should provide scripts to reproduce all experimental results for the new proposed method and baselines. If only a subset of experiments are reproducible, they should state which ones are omitted from the script and why.
- At submission time, to preserve anonymity, the authors should release anonymized versions (if applicable).
- Providing as much information as possible in supplemental material (appended to the paper) is recommended, but including URLs to data and code is permitted.

## 6. Experimental setting/details

Question: Does the paper specify all the training and test details (e.g., data splits, hyper-parameters, how they were chosen, type of optimizer, etc.) necessary to understand the results?

Answer: [Yes]

Justification: See our experiments in the Appendix, where we provide detailed descriptions of the experimental setup.

Guidelines:

- The answer NA means that the paper does not include experiments.
- The experimental setting should be presented in the core of the paper to a level of detail that is necessary to appreciate the results and make sense of them.
- The full details can be provided either with the code, in appendix, or as supplemental material.

## 7. Experiment statistical significance

Question: Does the paper report error bars suitably and correctly defined or other appropriate information about the statistical significance of the experiments?

Answer: [Yes]

Justification: See our experiments in the Appendix; we provide experiments in details.

Guidelines:

- The answer NA means that the paper does not include experiments.
- The authors should answer "Yes" if the results are accompanied by error bars, confidence intervals, or statistical significance tests, at least for the experiments that support the main claims of the paper.
- The factors of variability that the error bars are capturing should be clearly stated (for example, train/test split, initialization, random drawing of some parameter, or overall run with given experimental conditions).
- The method for calculating the error bars should be explained (closed form formula, call to a library function, bootstrap, etc.)
- The assumptions made should be given (e.g., Normally distributed errors).

- It should be clear whether the error bar is the standard deviation or the standard error of the mean.
- It is OK to report 1-sigma error bars, but one should state it. The authors should preferably report a 2-sigma error bar than state that they have a 96% CI, if the hypothesis of Normality of errors is not verified.
- For asymmetric distributions, the authors should be careful not to show in tables or figures symmetric error bars that would yield results that are out of range (e.g. negative error rates).
- If error bars are reported in tables or plots, The authors should explain in the text how they were calculated and reference the corresponding figures or tables in the text.

## 8. Experiments compute resources

Question: For each experiment, does the paper provide sufficient information on the computer resources (type of compute workers, memory, time of execution) needed to reproduce the experiments?

Answer: [Yes]

Justification: We provide the experimental details.

Guidelines:

- The answer NA means that the paper does not include experiments.
- The paper should indicate the type of compute workers CPU or GPU, internal cluster, or cloud provider, including relevant memory and storage.
- The paper should provide the amount of compute required for each of the individual experimental runs as well as estimate the total compute.
- The paper should disclose whether the full research project required more compute than the experiments reported in the paper (e.g., preliminary or failed experiments that didn't make it into the paper).

## 9. Code of ethics

Question: Does the research conducted in the paper conform, in every respect, with the NeurIPS Code of Ethics <https://neurips.cc/public/EthicsGuidelines>?

Answer: [Yes]

Justification: See our paper.

Guidelines:

- The answer NA means that the authors have not reviewed the NeurIPS Code of Ethics.
- If the authors answer No, they should explain the special circumstances that require a deviation from the Code of Ethics.
- The authors should make sure to preserve anonymity (e.g., if there is a special consideration due to laws or regulations in their jurisdiction).

## 10. Broader impacts

Question: Does the paper discuss both potential positive societal impacts and negative societal impacts of the work performed?

Answer: [Yes]

Justification: This paper presents work whose goal is to advance the field of Machine Learning. There are many potential societal consequences of our work, none of which we feel must be specifically highlighted here.

Guidelines:

- The answer NA means that there is no societal impact of the work performed.
- If the authors answer NA or No, they should explain why their work has no societal impact or why the paper does not address societal impact.
- Examples of negative societal impacts include potential malicious or unintended uses (e.g., disinformation, generating fake profiles, surveillance), fairness considerations (e.g., deployment of technologies that could make decisions that unfairly impact specific groups), privacy considerations, and security considerations.

- The conference expects that many papers will be foundational research and not tied to particular applications, let alone deployments. However, if there is a direct path to any negative applications, the authors should point it out. For example, it is legitimate to point out that an improvement in the quality of generative models could be used to generate deepfakes for disinformation. On the other hand, it is not needed to point out that a generic algorithm for optimizing neural networks could enable people to train models that generate Deepfakes faster.
- The authors should consider possible harms that could arise when the technology is being used as intended and functioning correctly, harms that could arise when the technology is being used as intended but gives incorrect results, and harms following from (intentional or unintentional) misuse of the technology.
- If there are negative societal impacts, the authors could also discuss possible mitigation strategies (e.g., gated release of models, providing defenses in addition to attacks, mechanisms for monitoring misuse, mechanisms to monitor how a system learns from feedback over time, improving the efficiency and accessibility of ML).

## 11. Safeguards

Question: Does the paper describe safeguards that have been put in place for responsible release of data or models that have a high risk for misuse (e.g., pretrained language models, image generators, or scraped datasets)?

Answer: [NA]

Justification: Our experiments are safe and without these concerns.

Guidelines:

- The answer NA means that the paper poses no such risks.
- Released models that have a high risk for misuse or dual-use should be released with necessary safeguards to allow for controlled use of the model, for example by requiring that users adhere to usage guidelines or restrictions to access the model or implementing safety filters.
- Datasets that have been scraped from the Internet could pose safety risks. The authors should describe how they avoided releasing unsafe images.
- We recognize that providing effective safeguards is challenging, and many papers do not require this, but we encourage authors to take this into account and make a best faith effort.

## 12. Licenses for existing assets

Question: Are the creators or original owners of assets (e.g., code, data, models), used in the paper, properly credited and are the license and terms of use explicitly mentioned and properly respected?

Answer: [Yes]

Justification: See our paper.

Guidelines:

- The answer NA means that the paper does not use existing assets.
- The authors should cite the original paper that produced the code package or dataset.
- The authors should state which version of the asset is used and, if possible, include a URL.
- The name of the license (e.g., CC-BY 4.0) should be included for each asset.
- For scraped data from a particular source (e.g., website), the copyright and terms of service of that source should be provided.
- If assets are released, the license, copyright information, and terms of use in the package should be provided. For popular datasets, [paperswithcode.com/datasets](https://paperswithcode.com/datasets) has curated licenses for some datasets. Their licensing guide can help determine the license of a dataset.
- For existing datasets that are re-packaged, both the original license and the license of the derived asset (if it has changed) should be provided.

- If this information is not available online, the authors are encouraged to reach out to the asset’s creators.

### 13. New assets

Question: Are new assets introduced in the paper well documented and is the documentation provided alongside the assets?

Answer: [NA]

Justification: the paper does not release new assets.

Guidelines:

- The answer NA means that the paper does not release new assets.
- Researchers should communicate the details of the dataset/code/model as part of their submissions via structured templates. This includes details about training, license, limitations, etc.
- The paper should discuss whether and how consent was obtained from people whose asset is used.
- At submission time, remember to anonymize your assets (if applicable). You can either create an anonymized URL or include an anonymized zip file.

### 14. Crowdsourcing and research with human subjects

Question: For crowdsourcing experiments and research with human subjects, does the paper include the full text of instructions given to participants and screenshots, if applicable, as well as details about compensation (if any)?

Answer: [NA]

Justification: The paper does not involve crowdsourcing nor research with human subjects.

Guidelines:

- The answer NA means that the paper does not involve crowdsourcing nor research with human subjects.
- Including this information in the supplemental material is fine, but if the main contribution of the paper involves human subjects, then as much detail as possible should be included in the main paper.
- According to the NeurIPS Code of Ethics, workers involved in data collection, curation, or other labor should be paid at least the minimum wage in the country of the data collector.

### 15. Institutional review board (IRB) approvals or equivalent for research with human subjects

Question: Does the paper describe potential risks incurred by study participants, whether such risks were disclosed to the subjects, and whether Institutional Review Board (IRB) approvals (or an equivalent approval/review based on the requirements of your country or institution) were obtained?

Answer: [NA]

Justification: It does not have these potential risks.

Guidelines:

- The answer NA means that the paper does not involve crowdsourcing nor research with human subjects.
- Depending on the country in which research is conducted, IRB approval (or equivalent) may be required for any human subjects research. If you obtained IRB approval, you should clearly state this in the paper.
- We recognize that the procedures for this may vary significantly between institutions and locations, and we expect authors to adhere to the NeurIPS Code of Ethics and the guidelines for their institution.
- For initial submissions, do not include any information that would break anonymity (if applicable), such as the institution conducting the review.

### 16. Declaration of LLM usage

1233 Question: Does the paper describe the usage of LLMs if it is an important, original, or  
1234 non-standard component of the core methods in this research? Note that if the LLM is used  
1235 only for writing, editing, or formatting purposes and does not impact the core methodology,  
1236 scientific rigorousness, or originality of the research, declaration is not required.

1237 Answer: [NA]

1238 Justification: core method development in this research does not involve LLMs as any  
1239 important, original, or non-standard components.

1240 Guidelines:

- 1241 • The answer NA means that the core method development in this research does not  
1242 involve LLMs as any important, original, or non-standard components.
- 1243 • Please refer to our LLM policy (<https://neurips.cc/Conferences/2025/LLM>)  
1244 for what should or should not be described.
